# Supplementary material for: Efficacy and safety of 1C class antiarrhythmic agent (propafenone) for supraventricular arrhythmias in septic shock compared to amiodarone: protocol of a prospective randomised double-blind study
Source: PubMed Central journal article supplement — BMJ Open. 2019 Sep 3;9(9):e031678. doi: 10.1136/bmjopen-2019-031678 (PMC6731952; doi:10.1136/bmjopen-2019-031678), 2019-09-03
Supplement: bmjopen-2019-031678.draft_revisions.pdf [file bmjopen-2019-031678.draft_revisions.pdf]

# BMJ Open

BMJ Open is committed to open peer review. As part of this commitment we make the peer review history of every article we publish publicly available.

When an article is published we post the peer reviewers' comments and the authors' responses online. We also post the versions of the paper that were used during peer review. These are the versions that the peer review comments apply to.

The versions of the paper that follow are the versions that were submitted during the peer review process. They are not the versions of record or the final published versions. They should not be cited or distributed as the published version of this manuscript.

BMJ Open is an open access journal and the full, final, typeset and author-corrected version of record of the manuscript is available on our site with no access controls, subscription charges or pay-per-view fees (<http://bmjopen.bmj.com>).

If you have any questions on BMJ Open's open peer review process please email [info.bmjopen@bmj.com](mailto:info.bmjopen@bmj.com)

# BMJ Open

## Prospective randomized double-blind study of efficacy and safety of 1c class antiarrhythmic agent (propafenone) for supraventricular arrhythmias in septic shock compared to amiodarone

|                               |                                                                                                                                                                                                                                                                                                                                                                                                                                                                                                                                                                                                                                                                                                                                                                                                                                                                                                                                                                                                                                                                                                                                                                                                                                                                                                                                                                                                                                                                                                                                                                                                                                                                                                                                                                                                                     |
|-------------------------------|---------------------------------------------------------------------------------------------------------------------------------------------------------------------------------------------------------------------------------------------------------------------------------------------------------------------------------------------------------------------------------------------------------------------------------------------------------------------------------------------------------------------------------------------------------------------------------------------------------------------------------------------------------------------------------------------------------------------------------------------------------------------------------------------------------------------------------------------------------------------------------------------------------------------------------------------------------------------------------------------------------------------------------------------------------------------------------------------------------------------------------------------------------------------------------------------------------------------------------------------------------------------------------------------------------------------------------------------------------------------------------------------------------------------------------------------------------------------------------------------------------------------------------------------------------------------------------------------------------------------------------------------------------------------------------------------------------------------------------------------------------------------------------------------------------------------|
| Journal:                      | <i>BMJ Open</i>                                                                                                                                                                                                                                                                                                                                                                                                                                                                                                                                                                                                                                                                                                                                                                                                                                                                                                                                                                                                                                                                                                                                                                                                                                                                                                                                                                                                                                                                                                                                                                                                                                                                                                                                                                                                     |
| Manuscript ID                 | bmjopen-2019-031678                                                                                                                                                                                                                                                                                                                                                                                                                                                                                                                                                                                                                                                                                                                                                                                                                                                                                                                                                                                                                                                                                                                                                                                                                                                                                                                                                                                                                                                                                                                                                                                                                                                                                                                                                                                                 |
| Article Type:                 | Protocol                                                                                                                                                                                                                                                                                                                                                                                                                                                                                                                                                                                                                                                                                                                                                                                                                                                                                                                                                                                                                                                                                                                                                                                                                                                                                                                                                                                                                                                                                                                                                                                                                                                                                                                                                                                                            |
| Date Submitted by the Author: | 14-May-2019                                                                                                                                                                                                                                                                                                                                                                                                                                                                                                                                                                                                                                                                                                                                                                                                                                                                                                                                                                                                                                                                                                                                                                                                                                                                                                                                                                                                                                                                                                                                                                                                                                                                                                                                                                                                         |
| Complete List of Authors:     | <p>Balik, Martin; 1st Medical Faculty, Charles University in Prague, Anaesthesia and Intensive Care</p> <p>Waldauf, Petr; University Hospital Kralovske Vinohrady, Anaesthesia and Intensive Care</p> <p>Maly, Michal; 1st Medical Faculty, Charles University in Prague, Anaesthesia and Intensive Care</p> <p>Matousek, Vojtech; 1st Medical Faculty, Charles University in Prague, Anaesthesia and Intensive Care</p> <p>Brozek, Tomas; 1st Medical Faculty, Charles University in Prague, Anaesthesia and Intensive Care</p> <p>Rulisek, Jan; 1st Medical Faculty, Charles University in Prague, Anaesthesia and Intensive Care</p> <p>Porizka, Michal; 1st Medical Faculty, Charles University in Prague, Anaesthesia and Intensive Care</p> <p>Sachl, Robert; 1st Medical Faculty, Charles University in Prague, Anaesthesia and Intensive Care</p> <p>Otahal, Michal; 1st Medical Faculty, Charles University in Prague, Anaesthesia and Intensive Care</p> <p>Brestovansky, Petr; 1st Medical Faculty, Charles University in Prague, Anaesthesia and Intensive Care</p> <p>Svobodova, Eva; 1st Medical Faculty, Charles University in Prague, Anaesthesia and Intensive Care</p> <p>Flaksa, Marek; 1st Medical Faculty, Charles University in Prague, Anaesthesia and Intensive Care</p> <p>Stach, Zdenek; 1st Medical Faculty, Charles University in Prague, Anaesthesia and Intensive Care</p> <p>Pazout, Jaroslav; University Hospital Kralovske Vinohrady, Anaesthesia and Intensive Care</p> <p>Duska, Frantisek; University Hospital Kralovske Vinohrady, Anaesthesia and Intensive Care</p> <p>Smid, Ondrej; 1st Medical Faculty, Charles University in Prague, 2nd Dept of Medicine</p> <p>Stritesky, Martin; 1st Medical Faculty, Charles University in Prague, Anaesthesia and Intensive Care</p> |
| Keywords:                     | Adult intensive & critical care < ANAESTHETICS, Echocardiography < CARDIOLOGY, Pacing & electrophysiology < CARDIOLOGY                                                                                                                                                                                                                                                                                                                                                                                                                                                                                                                                                                                                                                                                                                                                                                                                                                                                                                                                                                                                                                                                                                                                                                                                                                                                                                                                                                                                                                                                                                                                                                                                                                                                                              |

1  
2  
3  
4  
5  
6  
7  
8  
9  
10  
11  
12  
13  
14  
15  
16  
17  
18  
19  
20  
21  
22  
23  
24  
25  
26  
27  
28  
29  
30  
31  
32  
33  
34  
35  
36  
37  
38  
39  
40  
41  
42  
43  
44  
45  
46  
47  
48  
49  
50  
51  
52  
53  
54  
55  
56  
57  
58  
59  
60

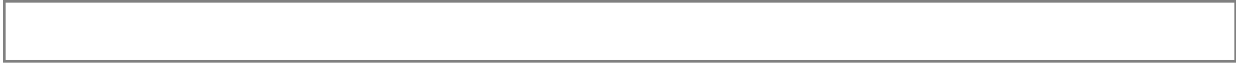

SCHOLARONE™  
Manuscripts

1  
2  
3  
4  
5  
6  
7  
8  
9  
10  
11  
12  
13  
14  
15  
16  
17  
18  
19  
20  
21  
22  
23  
24  
25  
26  
27  
28  
29  
30  
31  
32  
33  
34  
35  
36  
37  
38  
39  
40  
41  
42  
43  
44  
45  
46  
47  
48  
49  
50  
51  
52  
53  
54  
55  
56  
57  
58  
59  
60

# 1 Prospective randomized double-blind study of efficacy and safety of 1c class 2 antiarrhythmic agent (propafenone) for supraventricular arrhythmias in septic 3 shock compared to amiodarone 4

5 **Acronym: PRASE – Propafenone versus amiodarone in septic shock**  
6

7 Balik M<sup>1</sup>, Waldauf P<sup>2</sup>(petrwaldauf@gmail.com), Maly M<sup>1</sup>(michal.maly@vfn.cz), Matousek  
8 V<sup>1</sup>(vojtech.matousek@vfn.cz), Brozek T<sup>1</sup>(tomas.brozek@vfn.cz), Rulisek  
9 J<sup>1</sup>(jan.rulisek@vfn.cz), Porizka M<sup>1</sup>(michal.porizka@vfn.cz), Sachl R<sup>1</sup>(robert.sachl@vfn.cz),  
10 Otahal M<sup>1</sup>(michal.otahal@vfn.cz), Brestovansky P<sup>1</sup>(petr.brestovansky@vfn.cz), Svobodova  
11 E<sup>1</sup>(eva.svobodova@vfn.cz), Flaksa M<sup>1</sup>(marek.flaksa@vfn.cz), Stach Z<sup>1</sup>(zdenek.stach@vfn.cz),  
12 Pazout J<sup>2</sup>(jaroslav.pazout@gmail.com), Duska F<sup>2</sup>(fduska@yahoo.com), Smid  
13 O<sup>3</sup>(ondrej.smid@vfn.cz), Stritesky M<sup>1</sup>(martin.stritesky@vfn.cz)

14 <sup>1</sup>Department of Anesthesiology and Intensive Care, 1<sup>st</sup> Faculty of Medicine, Charles  
15 University and General University Hospital in Prague, Czechia, EU

16 <sup>2</sup>Department of Anaesthesiology and Intensive Care, 3<sup>rd</sup> Faculty of Medicine, Charles  
17 University and Kralovske Vinohrady University Hospital in Prague

18 <sup>3</sup>2<sup>nd</sup> Department of Medicine – Dept of Cardiovascular Medicine, 1<sup>st</sup> Faculty of Medicine,  
19 Charles University and General University Hospital in Prague

## 20 **Corresponding author:**

21 Martin Balik, M.D., Ph.D. , Department of Anesthesiology and Intensive Care, 1<sup>st</sup> Faculty of  
22 Medicine, Charles University and General University Hospital, U nemocnice 2, Prague 2, 128  
23 00, Czech Republic, tel: +420 224962244, fax: +420 224962118, e-mail: [martin.balik@vfn.cz](mailto:martin.balik@vfn.cz)

## 24 **Word count:**

25 Abstract: 300 words

26 Body of the text: 3968 words

27 ClinicalTrials.gov Identifier: NCT03029169  
28

## Abstract

**Introduction:** Supraventricular arrhythmias contribute to a haemodynamic compromise in septic shock. A retrospective study generated the hypothesis that propafenone could be more effective than amiodarone in achieving and maintaining sinus rhythm. The success of cardioversion might be predicted by certain echocardiographic parameters, which can guide the decision whether to aim for rhythm or rate control.

**Methods and Analysis:** The trial includes septic shock patients with new-onset arrhythmia, but without severe impairment of the left ventricular ejection fraction. After baseline echocardiography, the patient is randomised to receive a bolus and maintenance dose of either amiodarone or propafenone. The primary outcome is the proportion of patients that have achieved rhythm control at 24 hours after the start of the infusion. The secondary outcomes are the percentages of patients that needed rescue treatments (DC cardioversion or unblinding and cross over of the antiarrhythmics), recurrence of arrhythmias, ICU mortality, 28-day and 1-year mortality. In the post-hoc analysis we separately assess subgroups of patients with pulmonary hypertension and right ventricular dysfunction. In the exploratory part of the study we assess whether the presence of a transmitral diastolic A wave and its higher velocity-time integral is predictive for the sustainability of mechanical sinus rhythm and whether the indexed left atrial endsystolic volume is predictive of recurrent arrhythmia. Considering that the restoration of sinus rhythm within 24h occurred in 74% of the amiodarone-treated patients and in 89% of patients treated with propafenone, we plan to include 200 patients to have an 80% chance to demonstrate the superiority of propafenone at  $p=0.05$ .

**Ethics and Dissemination:** The trial is recruiting patients according to its 2<sup>nd</sup> protocol version approved by the University Hospital Ethical Board on the 6<sup>th</sup> October 2017. The results will be disseminated through peer reviewed publications and conference presentations.

**Trial registration:** ClinicalTrials.gov Identifier: NCT03029169, registered on 24.1.2017

**Key words:** supraventricular arrhythmia, septic shock, propafenone, amiodarone, intensive care

## 1 Article Summary: Strengths and limitations of this study

- 2 - Randomized controlled trial comparing propafenone versus amiodarone in septic
- 3 shock patients with normal to moderately reduced EF\_LV should prove the superior
- 4 efficacy of propafenone.
- 5 - The trial should prove the safety of the 1C class agent propafenone given within the
- 6 summary of product characteristics – in contrast to the older trials on non-ICU
- 7 patients.
- 8 - Actively pursuing sinus rhythm may contribute to the therapy of diastolic dysfunction
- 9 with a positive impact on the outcome.
- 10 - A complex echocardiography assessment may contribute to the decision whether to
- 11 aim for rhythm or for rate control therapy. The application of simple echo parameters
- 12 may be suggested as part of the focused critical care echocardiography performed by
- 13 an intensivist on a patient with arrhythmia of unknown duration.
- 14 - Due to scarcity of data in current literature the hypotheses are based on a single large
- 15 retrospective study on septic shock patients with SV arrhythmias.

## 18 Introduction

19 The incidence of supraventricular (SV) arrhythmias varies between 8-25% in the critically ill  
 20 depending on the illness severity<sup>1-5</sup>. The new onset SV arrhythmias are contributor to the  
 21 diastolic and systolic heart failure<sup>6</sup>. The loss of the atrial systole associates with two to five  
 22 times increased mortality among critically ill patients<sup>1-3</sup> which is in contrast to a lacking  
 23 evidence that reverting back to sinus rhythm (SR) improves outcome<sup>7,8</sup>. The uncertainty  
 24 whether to aim for rate control rather than for rhythm control therapy originates also from  
 25 the observed recurrence of arrhythmias and the side effects of the antiarrhythmics.

26 Moreover, a recent study on perioperative atrial fibrillation (AF) included the same  
 27 antiarrhythmic agents and showed similar rates of electric cardioversion in 25% of the  
 28 patients recruited either to a rhythm control or a rate control arm demonstrating the  
 29 significant overlap between both approaches<sup>9</sup>.

30 Besides improving oxygenation, preload and electrolyte corrections, electric cardioversion is  
 31 indicated in unstable patients with no contraindications and is more feasible in combination  
 32 with an antiarrhythmic agent due to high rates of an early relapse of atrial fibrillation<sup>10</sup>.

33 The data on various antiarrhythmic medications in current literature shows some important  
 34 limitations, particularly the absence of an echocardiographic protocol before deciding on  
 35 treatment<sup>6</sup>. Some of the available studies lack an attempt to avoid potentially unfeasible  
 36 medication in an unstable, critically ill patient. For example, a large pool (36%) of patients in  
 37 sepsis was medicated with calcium channel blockers which can help with rate control at the  
 38 cost of reducing ventricular contractility and promotion of vasodilatation. These side effects  
 39 may critically impact upon haemodynamic stability in a patient with left ventricular

1  
2  
3 1 compromise and/or septic vasoplegia<sup>11</sup>. In the studies suggesting beneficial effects of  
4 2 betablockers<sup>12-15</sup> the haemodynamic monitoring did not include echocardiography and the  
5 3 comparisons to control patients were fraught with high mortality of the control group<sup>13</sup>.  
6 4 Several limitations have to be considered prior to beta-blocker administration in septic shock  
7 5 patients. These are especially exclusion of the severe LV systolic dysfunction, valve and  
8 6 conduction disorders<sup>14 16</sup>.

9 7 The mainstay of antiarrhythmic therapy<sup>6</sup> is represented by amiodarone which is preferred for  
10 8 its lower cardiodepressant side effect compared to other agents and electric cardioversion<sup>17-  
11 9 20</sup>. The adverse effects of amiodarone involve thyroid function<sup>21 22</sup>, corneal microdeposits,  
12 10 hepatic dysfunction<sup>23 24</sup>, interstitial pneumonia and pulmonary fibrosis<sup>25 26</sup>, skin discoloration  
13 11 and neuropathies<sup>27 28</sup>. Hypotension may occur due to amiodarone's vasodilatory effects and  
14 12 QTc prolongation associates with the occurrence of torsades-des-pointes type of ventricular  
15 13 tachycardia. Extensive use of amiodarone contrasts with its multiorgan side effects and its  
16 14 application even in cardiology patients with normal LV systolic function<sup>29 30</sup> demonstrates  
17 15 poor compliance with current guidelines<sup>31</sup>.

18 16 The use of 1C class antiarrhythmic drugs in the treatment of SV arrhythmias in the critically ill  
19 17 has not been properly evaluated. There are only a few case reports available describing serious  
20 18 adverse effects apparently related to their dose related cardiotoxicity<sup>32-34</sup>. The use of 1C  
21 19 agents has been discouraged by reports describing poor outcome during long term  
22 20 administration in the cardiology population<sup>32</sup>. Consequently, 1C class agents like propafenone  
23 21 and flecainide<sup>35</sup>, are scarcely used in the critically ill. In contrast to flecainide and encainide,  
24 22 propafenone is derived from propandiolamine, which is a chemical compound of betablockers  
25 23 and acts on the rapid depolarizing phase (phase 0) and also, to a minimal extent, on beta-  
26 24 adrenergic receptors<sup>36-38</sup>. Compared to flecainide, propafenone also lacks any evidence of its  
27 25 relationship to mortality<sup>39</sup>.

28 26 Our retrospective study<sup>4 5</sup> suggests that propafenone might be feasible to restore SR  
29 27 without an adverse effect on haemodynamics and with a possible benefit on the outcome of  
30 28 the septic shock patients (Fig.1)<sup>4 5</sup>. A chance to cardiovert seemed to be significantly higher  
31 29 under propafenone than in amiodarone and was close to the cardioversion rates of the  
32 30 betablocker metoprolol. No secondary arrhythmias or conduction disorders requiring  
33 31 treatment other than adjustment of the rate of infusion were observed<sup>4 5</sup>. A typical patient  
34 32 benefiting from propafenone has normal to moderately reduced left ventricular systolic  
35 33 function. Another recent retrospective study found faster and more successful cardioversion  
36 34 with propafenone as compared to amiodarone for new onset atrial fibrillation in an  
37 35 emergency department. The safety profiles of the two agents were not different<sup>40</sup>.

38 36 The current trial is intended to prospectively verify the efficacy and safety of propafenone  
39 37 administered under echocardiography control in the critically ill with septic shock. The trial  
40 38 also challenges the concept of amiodarone applied as a relatively toxic universal  
41 39 antiarrhythmic agent with a similar short-term safety profile as propafenone, whilst being  
42 40 slower and less efficient in cardioverting a supraventricular arrhythmia in a septic shock  
43 41 patient.

1  
2  
3 1 The authors also hypothesize that actively pursuing sinus rhythm and cardioverting patients  
4 2 may contribute to the therapy of diastolic dysfunction with a positive impact on mortality<sup>7</sup>.  
5 3 An echocardiography driven prediction of cardioversion in the critically ill patients has not  
6 4 been explored in the available literature. It seems that the degree of dependence of the left  
7 5 ventricular filling on atrial systole would be an important entity when deciding between  
8 6 rhythm and rate control in SV arrhythmia in septic critically ill patients. The rate control  
9 7 modality should be reserved for a chronic persistent AF and in situations when sinus rhythm  
10 8 is difficult to maintain due to high dosage of vasoactive agents.  
11 9

## 10 **Methods/Design**

11  
12 We designed a prospective double blinded randomized trial comparing propafenone to  
13 13 amiodarone administered for a SV arrhythmia in critically ill patients with septic shock.  
14

### 15 **Primary aims**

16 The trial should prove that propafenone is more efficient than amiodarone in cardioverting a  
17 17 SV arrhythmia in patients with normal to moderately reduced EF\_LV at 24h from the onset.  
18 The rationale stems from the retrospective data set where the primary cardioversion rate of  
19 19 SV arrhythmia under propafenone was 88.9% versus 73.5% under amiodarone<sup>4,5</sup>. The  
20 20 authors also expect faster cardioversion under propafenone and lower rates of arrhythmia  
21 21 recurrence in the propafenone group. Despite prejudices arising particularly from the CAST  
22 22 trial and case reports on dose dependent toxicity, research should prove the safety of the 1C  
23 23 class agent propafenone given within the summary of product characteristics<sup>33,35</sup>. The  
24 24 retrospective study<sup>4,5</sup> has shown that the ICU and 28-day mortalities of patients treated  
25 25 with propafenone were better than the parameters of the amiodarone patients. In other  
26 26 words, the propafenone administration did not increase mortality as suggested by the older  
27 27 trials on non-ICU patients<sup>32-34</sup>. Moreover, patients with a supraventricular arrhythmia  
28 28 treated with propafenone had significantly better adjusted 12-month survival than the  
29 29 critically ill treated with amiodarone (Fig.1). If proven, the physicians could avoid a  
30 30 widespread use of amiodarone in the critically ill.

31 The cardioverted patients (rhythm control) may showcase better outcome parameters (ICU  
32 32 mortality, 28-day mortality, 1-year mortality) than those remaining in an acute onset  
33 33 arrhythmia (rate control). A rationale beyond this hypothesis is in the pilot study<sup>4,5</sup> which  
34 34 also included patients with severe LV dysfunction and associated higher rates of recurrent SV  
35 35 arrhythmias. Focusing on only normal to moderate LV systolic dysfunction may minimize bias  
36 36 associated with arrhythmia treatment of patients with severe LV systolic dysfunction.  
37 37 Likewise, those patients were included in the published trials dealing with either 1C class  
38 38 antiarrhythmics (e.g. CAST trial,<sup>32</sup>) or in the trials studying rhythm vs rate control (e.g.  
39 39 AFFIRM, RACE or AF-CHF Trial,<sup>9,41-43</sup>). Due to high success of rhythm control therapy (74.4%  
40 40 and 87% excluding chronic AF) in the retrospective study on 234 patients<sup>4,5</sup>, the group with



1  
2  
3 1 persisting acute onset SV arrhythmia was significantly smaller in number causing an  
4 2 asymmetry in statistic evaluation. This may also account for not significantly better outcome  
5 3 of the cardioverted versus those remaining in the SV arrhythmias (Fig.2).  
6 4  
7 4  
8 4

### 9 5 **Secondary aims**

10 6 The presence of a transmitral diastolic A wave and its higher velocity-time integral (VTI) at 4h  
11 7 post cardioversion would indicate a presence of mechanical sinus rhythm. A small or  
12 8 negligible A wave may represent only the electric sinus in the absence of its mechanical  
13 9 correlate. This finding could be related to the increased indexed left atrial end-systolic  
14 10 volume (LAVi) and to a recurrence of a SV arrhythmia<sup>44 45</sup>. The LAVi in all patients and altered  
15 11 filling pressures estimated by echocardiography could be predictive of the arrhythmia  
16 12 recurrence<sup>46 47</sup>.

17 13 Propafenone would be more efficient than amiodarone in patients with pulmonary  
18 14 hypertension and RV dysfunction without left ventricular systolic dysfunction.

19 15 A left ventricular relaxation disorder and a pseudonormal LV filling are more dependent on  
20 16 atrial kick compared to the restrictive LV filling which is often accompanied by a dilated  
21 17 poorly contracting left atrium. The classic stratification of diastolic dysfunction relates to  
22 18 patient's prognosis in septic shock<sup>48</sup>. Hence, a complex echo assessment may contribute to  
23 19 the decision whether to aim for rhythm or for rate control only. The evaluation of the  
24 20 doppler parameters will depend on rhythm, heart rate, regularity of arrhythmia and  
25 21 peripheral pulse deficit<sup>44 46</sup>.  
26 22  
27 22

### 28 23 **Flow chart (Fig.3, Fig.4) and study setting**

29 24  
30 25 Patients are randomized by the unblinded team lead by a research nurse. The planned  
31 26 number of included patients is 100 in each arm of the study with a total of 220 randomized  
32 27 patients. A dropout of 10% is anticipated. The estimated duration of the study is 4 years  
33 28 including follow up. The patients have been recruited since November 2017 in three  
34 29 university hospital ICUs. The department of Anaesthesia and Intensive Care of the General  
35 30 University Hospital has been performing for years as a teaching centre for critical care  
36 31 echocardiography and ultrasound. Together with the Coronary Care Unit of the General  
37 32 University Hospital both departments are integrated as a Complex Cardiovascular Centre.  
38 33 The department of Anaesthesia and Intensive Care of the University Hospital Vinohrady is a  
39 34 mainstay of the Complex Prague Traumacentre.  
40 35  
41 35  
42 35

### 43 36 **Inclusion Criteria**

44 37  
45 38 The study targets patients in septic shock with a new onset SV arrhythmia or known  
46 39 paroxysmal SV arrhythmia who show normal or mildly to moderately reduced LV systolic  
47 40 function according to the echocardiography examination (i.e. EF\_LV  $\geq$ 35%). A diagnosis of  
48 40  
49 40  
50 40  
51 40  
52 40  
53 40  
54 40  
55 40  
56 40  
57 40  
58 40  
59 40  
60 40

1 septic shock is made according to the 2016 definition<sup>49</sup> as sepsis with a vasopressor  
2 requirement to maintain a mean arterial pressure of 65 mm Hg or greater. The arterial  
3 lactate level should be greater than 2 mmol/L in the absence of hypovolemia or low cardiac  
4 output. The highest arterial lactate level is recorded, i.e. lactate <2.0 mmol/l at the time of  
5 randomization does not exclude a patient from the study. This might also be justified by the  
6 reported incidence of the sepsis related cardiac dysfunction which is highest 72-96h after an  
7 onset of septic shock<sup>50</sup>. The presence of a suspected infection is for the purpose of this  
8 study defined as a positivity of at least one inflammatory marker of the monitored CRP and  
9 PCT and a clinical decision to administer antibiotic treatment for a specified infection source.

## 11 Exclusion Criteria

13 The study respects all exclusion criteria for a blinded administration of propafenone or  
14 amiodarone. These are severe LV systolic dysfunction (i.e. EF<35%), a history indicating more  
15 than 1<sup>st</sup> degree AV block and a high dose vasopressor therapy represented by continuous  
16 noradrenaline administration of more than 1.0 ug/kg.min. Contraindications to  
17 randomisation are known intolerance to amiodarone or propafenone, iodine allergy and an  
18 active thyroid disease other than chronic hormone substitution for benign goiter. Chronic  
19 persistent AF represents an exclusion while known chronic paroxysmal AF is not an exclusion  
20 criterion. Patients dependent on a pacemaker or after a Maze procedure are also excluded.

## 22 Interventions and research protocol

24 Patients will have a haemodynamic examination provided according to the study protocol.  
25 With the onset of arrhythmia, the usual treatment is expected including preload correction,  
26 reduction of unnecessary vasopressors, ion supplementation (aiming particularly for K<sup>+</sup> >4.0  
27 mM and Mg<sup>2+</sup> > 1.0 mM) and maintenance of tissue oxygen delivery. Echocardiography  
28 should also guide optimization of preload.

29 The complex protocol is formatted in an electronic case report form (CRF). After checking up  
30 the inclusion and exclusion criteria the CRF allocates the patients randomly using built in  
31 software ([www.randomization.com](http://www.randomization.com)) into the propafenone or amiodarone arm.

32 The patient's characteristics include the illness severity scores, source of septic shock, data  
33 on mechanical ventilation and homeostasis, baseline haemodynamic data, baseline  
34 laboratory data, patient's medications, haemodynamic data at proposed steps plus follow up  
35 data including outcome.

36 Haemodynamic evaluation includes ICU standard plus echocardiography. The study team  
37 involves 8 intensivists with an European Accreditation in Echocardiography (either ESC or  
38 EACTA backed) and three qualified cardiologists-intensivists.

39 By no means is an antiarrhythmic given out of the summary of product characteristics. Both  
40 arms will have standard treatment, there are no limits to electric cardioversion as part of

1  
2  
3 1 treatment which is indicated anytime in haemodynamic compromise and in signs of low  
4 2 cardiac output or not sufficient perfusion pressures due to arrhythmia.  
5 3 The propafenone arm constitutes administering a bolus of 35-70 mg of intravenous  
6 4 propafenone followed by a continuous infusion of 400-840 mg/24h in a black syringe. The  
7 5 amiodarone arm constitutes administering a bolus of 150-300 mg of intravenous  
8 6 amiodarone followed by a continuous infusion of 600-1800 mg/24h in a black syringe.  
9 7 A 12-lead ECG is taken every 12h whilst the antiarrhythmic infusion. Besides  
10 8 echocardiography pre-randomization the control echocardiography is performed 1h post  
11 9 cardioversion and 4h post cardioversion. Echocardiography is performed also every day until  
12 10 cardioversion, it is also mandatory in any kind of haemodynamic instability. All the Doppler  
13 11 measurements are recorded at end-expiration and 3 cardiac cycles, when sinus rhythm, and  
14 12 5-10, during arrhythmia, are analysed and averaged. All recordings should be acquired with  
15 13 an ECG (lead II), and ideally, at the speed of 100 mm/s.  
16 14 If electrically cardioverted in addition to administered pharmacotherapy, then  
17 15 echocardiography is performed 1h post cardioversion and 4h post cardioversion.  
18 16 If cardioverted later than until 24h then echocardiographies are performed at 1h and 4h  
19 17 after cardioversion, the times of cardioversion and arrhythmia relapses are always recorded.  
20 18  
21 19  
22 20  
23 21  
24 22  
25 23  
26 24  
27 25  
28 26  
29 27  
30 28  
31 29  
32 30  
33 31  
34 32  
35 33  
36 34  
37 35  
38 36  
39 37  
40 38  
41 39  
42 40  
43 41  
44 42  
45 43  
46 44  
47 45  
48 46  
49 47  
50 48  
51 49  
52 50  
53 51  
54 52  
55 53  
56 54  
57 55  
58 56  
59 57  
60 58

### 20 **Primary outcome measures**

- 21  
22 1. The efficacy in restoration of sinus rhythm assessed as the proportion of patients  
23 24 who are in sinus rhythm 24 hours after the beginning of the infusion of the study drug and  
25 26 remain in sinus rhythm until discharge from ICU. Primary outcome will be assessed in all  
27 28 randomised patients (i.e. intention to treat analysis).  
29 30 2. A-priori defined subgroup analysis: Primary outcome will be analysed in the following  
31 32 subgroups of patients:  
33 34 a) with and without indexed left atrial endsystolic volume (LAVi) higher than >40 ml/m<sup>2</sup>.  
35 36 b) with and without pulmonary hypertension (defined as PAPs >40 mmHg) associated with  
37 38 moderate to severe RV dysfunction (dilated RV with TAPSE <15 mm)  
39 40  
41 41  
42 42  
43 43  
44 44  
45 45  
46 46  
47 47  
48 48  
49 49  
50 50  
51 51  
52 52  
53 53  
54 54  
55 55  
56 56  
57 57  
58 58  
59 59  
60 60

### 33 **Secondary outcome measures**

- 34  
35 1. The cumulative proportion of patients receiving rescue treatment for arrhythmia  
36 37 defined as direct current cardioversion or an alternative antiarrhythmic drug during the first  
38 39 24 hours (cross-over from one arm to the other resulting in unblinding of the study, e.g.  
40 41 from amiodarone to propafenone due to a persisting arrhythmia or from propafenone to  
42 43 amiodarone due to a decrease in LV systolic function).  
44 44  
45 45  
46 46  
47 47  
48 48  
49 49  
50 50  
51 51  
52 52  
53 53  
54 54  
55 55  
56 56  
57 57  
58 58  
59 59  
60 60

2. The cumulative proportion of patients receiving rescue treatment for arrhythmia defined as direct current cardioversion, cross-over to the alternative study drug or other antiarrhythmic drug during ICU stay.
3. Mortality at discharge from ICU, at 28 days and at 1 year.
4. Vasopressor-free days at day 28.

### **Safety issues and patient's monitoring**

Besides cardioversion monitoring the TTE is also acquired in any kind of haemodynamic instability (i.e. change in vasopressor support). This is important to avoid administering a potentially cardiodepressant propafenone in a patient developing septic cardiomyopathy. 12 hourly 12-lead ECG for monitoring of conduction times (PQ, QRS, QTc) is performed while the patient is on the antiarrhythmic infusion. In case of an AV block of the first degree or extension of the conduction times (QRS or QTc) the slowing or temporary ceasing of the medication in relation to heart rate is mandatory. Adjustment of the infusion rate or eventual termination of an antiarrhythmic medication does not exclude the patient from the study. Ceasing of medication after reaching sinus rhythm does not exclude the patient too. If an infusion is interrupted and restarted then the number of infusion hours are counted up as a sum of infusion hours.

In case of a progression of septic cardiomyopathy and a decrease of contractility (decrease of EFLV to <35%) or a progression of mitral regurgitation with a risk of low cardiac output the study drug is unblinded and propafenone discontinued. Further treatment is decided by the clinician. If the study is unblinded due to haemodynamic instability, the second drug after study arm cross-over is administered without an initial bolus.

Anytime the patient becomes haemodynamically unstable or has another reason (as per discretion of the treating clinician) to benefit from electric cardioversion (DCC), then DCC is delivered without delay.

Should there be a concern at any point in time about the safety of the drug, the treating clinicians are encouraged to unblind the treatment drug without delay, and alter the treatment accordingly. The course of the trial is regularly reported to the hospital Ethical Board which acts as the research supervising body. The minimum frequency of the report is once per year throughout the duration of the trial which is proposed from 2018 till 2021.

### **Statistics and power analysis**

The logistic regression and time-to-event (Cox) regression with and without adjustment for baseline patients' characteristics will be applied in the statistic analysis. The multivariate analysis will include the patients' baseline parameters which would be correlated with an analysed outcome parameter and will be inhomogeneously distributed within the study

1 groups regardless of the randomisation. The required number of patients is based on the  
2 power analysis and data from the pilot retrospective study <sup>45</sup>.  
3 The entry parameters for the sample size analysis were estimated by the probabilities of  
4 cardioversion of 75% for the amiodarone group and 90% for the propafenone group within  
5 24h from the onset of arrhythmia, randomisation ratio 1:1, p=0.05 and power 0.8. To  
6 achieve a statistically significant difference under these conditions 100 patients need to be  
7 included into each group, altogether 200 patients into the trial. Assuming 10% drop out the  
8 authors plan to randomize 220 patients.

### 9 10 **Ethics approval and dissemination:**

11  
12 The local ethical approvals have been received from the Ethics Committee of the 1<sup>st</sup> Medical  
13 Faculty and General University Hospital (No. 1691/16 S-IV) and from the Ethics Committee of  
14 the 3<sup>rd</sup> Medical Faculty and University Hospital Kralovske Vinohrady. The written informed  
15 consent is sought from the patient's next of kin. The results will be disseminated through  
16 peer reviewed publications and conference presentations. The study repository will be  
17 created with the dataset available after study completion. The recruitment has begun  
18 through the electronic case report form on the 23<sup>rd</sup> October 2017 and is expected to be  
19 completed in December 2021.

### 20 21 **Limitations and conclusions**

22  
23 The available literature on SV arrhythmias in septic shock shows critically ill patients with a  
24 high predicted mortality, IPPV rate of 99% and high rates of CRRT (27-31%) <sup>45</sup>. Up to now all  
25 the authors adhered to the septic shock criteria based on volume non-responsive SIRS with a  
26 need for a vasopressor and antibiotic therapy administered for an infectious source <sup>51</sup>.  
27 Applying the novel septic shock criteria of 2016 <sup>49</sup> may increase specificity at the cost of  
28 lacking sensitivity to include even those who could potentially benefit from septic shock  
29 therapy <sup>52</sup>. If applying the results of the current trial to less severe patients, e.g. those  
30 classified according to the older criteria, the SOFA score and a median arterial lactate level  
31 may serve as controls adjusting studied population in context of the novel septic shock  
32 criteria published in 2016 <sup>49</sup>.

33 The hypothesis that propafenone might be superior to amiodarone in cardioverting newly  
34 appearing SV arrhythmia with an impact on the long term outcome may not be proved due  
35 to the confounding factors of the retrospective study <sup>45</sup>. Albeit being statistically  
36 insignificant, the LV systolic function was mildly higher in propafenone and betablocker  
37 patients compared to those on amiodarone. The severe LV systolic dysfunctions were  
38 medicated with amiodarone as well as patients on a higher dosage of noradrenaline  
39 compared to the patients with moderate to mild LV systolic dysfunction and the lower  
40 dosage of noradrenaline in the propafenone and betablocker groups <sup>45</sup>.

1  
2  
3 1 The retrospective study included also patients with a cross-over from a not successful  
4 2 antiarrhythmic therapy to another group during 24 hours as part of the rhythm control  
5 3 strategy. This increased the pool of the propafenone patients after administering the agent  
6 4 in patients who were not able to cardiovert and maintain sinus rhythm on amiodarone <sup>45</sup>.  
7 5 This might represent a so far not reported synergistic effect of the two antiarrhythmic  
8 6 agents on achieving a high cardioversion rate, yet with a very acceptable safety profile <sup>45</sup>.  
9 7 The current prospective trial allows a cross-over between the arms however, only in a  
10 8 haemodynamic instability and with immediate unblinding.  
11 9 The observed median age in an adult ICU varies around 55-65 years. The age related  
12 10 prevalence of hypertension and ischaemic heart disease suggests a large proportion of  
13 11 patients with a benefit of atrial systole and thus an indication for the rhythm control  
14 12 approach <sup>7</sup>. The prevalence of newly occurring SV arrhythmias and the broad spectrum of  
15 13 potentially reversible triggers in the critically ill offer an opportunity for cardioversion in  
16 14 closely monitored patients rather than in ambulatory patients in cardiology. Moreover,  
17 15 septic shock is often fraught with diastolic dysfunction and to restore sinus rhythm might be  
18 16 of paramount importance for the therapy of diastolic heart failure.

19 **List of abbreviations:** AF atrial fibrillation, APACHE II acute physiologic and chronic health  
20 20 evaluation, AV atrio-ventricular, CRRT continuous renal replacement therapy, CRP C reactive  
21 21 protein, DCC direct current cardioversion, DO<sub>2</sub>/VO<sub>2</sub> oxygen delivery/oxygen consumption,  
22 22 EF ejection fraction, EF\_LV ejection fraction of left ventricle, ICU intensive care unit, K<sup>+</sup>  
23 23 plasmatic potassium, LA left atrium, LAVi indexed end-systolic left atrial volume, LV left  
24 24 ventricle/ left ventricular, LVOT left ventricular outflow tract, Mg<sup>2+</sup> plasmatic magnesium,  
25 25 PAPs pulmonary artery systolic pressure, PCT procalcitonin, PRCT prospective controlled  
26 26 randomized trial, RV right ventricle, SIRS systemic inflammatory response syndrome, SOFA  
27 27 sequential organ function assessment, SR sinus rhythm, SV supraventricular, TAPSE tricuspid  
28 28 annular plane excursion, TTE transthoracic echocardiography, VTI velocity-time integral

### 31 **Author Contributions**

32 32 MB – study coordinator, concept and design, drafting, revisions and approval of articles,  
33 33 provision of funding. PW, FD – concept and design, electronic case report form, statistics,  
34 34 article revisions, data collection. MP, JR, MO, VM, MM, TB, RS, JP, PB, ES, MF, ZS, MS – data  
35 35 collection, article revisions. OS – article revisions, data collection, unblinded team  
36 36 coordination.

### 39 **Funding**

1  
2  
3  
4  
5  
6  
7  
8  
9  
10  
11  
12  
13  
14  
15  
16  
17  
18  
19  
20  
21  
22  
23  
24  
25  
26  
27  
28  
29  
30  
31  
32  
33  
34  
35  
36  
37  
38  
39  
40  
41  
42  
43  
44  
45  
46  
47  
48  
49  
50  
51  
52  
53  
54  
55  
56  
57  
58  
59  
60

1 The protocol has received a four year (2018-2022) grant support from the Czech Health  
2 Research Council, AZV No. NV18-06-00417, commencing on the 1<sup>st</sup> of May 2018.

3 Financial disclosure statement: The echocardiographic devices used for the study purpose  
4 were financed from project reg.no. CZ.2.16/3.1.00/21565 from OP Prague Competitiveness.  
5 This sponsor did not have any role in study design, collection, analysis and interpretation of  
6 the data, in the writing of the paper and in the decision to submit the article for publication.

7  
8 **Competing interests:** None

9  
10  
11  
12  
13  
14  
15  
16  
17  
18  
19  
20  
21  
22  
23  
24  
25  
26  
27  
28  
29  
30  
31  
32  
33  
34  
35  
36  
37  
38  
39  
40  
41  
42  
43  
44  
45  
46  
47  
48  
49  
50  
51  
52  
53  
54  
55  
56  
57  
58  
59  
60

For peer review only

## 1 References

1. Arrigo M, Bettex D, Rudiger A. Management of atrial fibrillation in critically ill patients. *Critical care research and practice* 2014;2014:840615. doi: 10.1155/2014/840615 [published Online First: 2014/02/15]
2. Kuipers S KKP, Cremer OL. Incidence, risk factors and outcomes of new-onset atrial fibrillation in patients with sepsis: a systematic review. *Crit Care* 2014;18(6):688.
3. Klein Klouwenberg PM FJ, Kuipers S, Ong DS, Peelen LM, van Vught LA, Schultz MJ, van der Poll T, Bonten MJ, Cremer OL; MARS consortium. Incidence, Predictors and Outcomes of New-onset Atrial Fibrillation in Critically Ill Patients with Sepsis: a Cohort Study. *Am J Respir Crit Care Med* 2016 doi: 10.1164/rccm.201603-0618OC [published Online First: 28 Jul 2016]
4. Balik M, Kolnikova I, Maly M, et al. Propafenone for supraventricular arrhythmias in septic shock- Comparison to amiodarone and metoprolol. *Journal of critical care* 2017;41:16-23. doi: 10.1016/j.jcrc.2017.04.027 [published Online First: 2017/05/04]
5. Balik M, Maly M, Brozek T, et al. Propafenone for supraventricular arrhythmias in septic shock – Comparison to amiodarone and metoprolol. The author’s reply. *Journal of critical care* 2018;45:247-48. doi: 10.1016/j.jcrc.2018.01.024 [published Online First: 2018/02/06]
6. Balik M, Matousek V, Maly M, et al. Management of arrhythmia in sepsis and septic shock. *Anaesthesiology intensive therapy* 2017;49(5):419-29. doi: 10.5603/AIT.a2017.0061 [published Online First: 2017/11/19]
7. Balik M. New-onset atrial fibrillation in critically ill patients - Implications for rhythm rather than rate control therapy? *International journal of cardiology* 2018;266:147-48. doi: 10.1016/j.ijcard.2018.04.078 [published Online First: 2018/06/12]
8. Liu WC, Lin WY, Lin CS, et al. Prognostic impact of restored sinus rhythm in patients with sepsis and new-onset atrial fibrillation. *Crit Care* 2016;20(1):373. doi: 10.1186/s13054-016-1548-2 [published Online First: 2016/11/20]
9. Gillinov AM, Bagiella E, Moskowitz AJ, et al. Rate Control versus Rhythm Control for Atrial Fibrillation after Cardiac Surgery. *The New England journal of medicine* 2016;374(20):1911-21. doi: 10.1056/NEJMoa1602002 [published Online First: 2016/04/05]
10. Arrigo M, Jaeger N, Seifert B, et al. Disappointing Success of Electrical Cardioversion for New-Onset Atrial Fibrillation in Cardiosurgical ICU Patients. *Critical care medicine* 2015;43(11):2354-9. doi: 10.1097/ccm.0000000000001257 [published Online First: 2015/10/16]
11. Walkey AJ, Evans SR, Winter MR, et al. Practice Patterns and Outcomes of Treatments for Atrial Fibrillation During Sepsis: A Propensity-Matched Cohort Study. *Chest* 2016;149(1):74-83. doi: 10.1378/chest.15-0959 [published Online First: 2015/08/14]
12. Morelli A DA, Ertmer C, Rehberg S, Kampmeier T, Orecchioni A, D'Egidio A, Cecchini V, Landoni G, Pietropaoli P, Westphal M, Venditti M, Mebazaa A, Singer M. Microvascular effects of heart rate control with esmolol in patients with septic shock: a pilot study. *Crit Care Med* 2013;41(9):2162-68.
13. Morelli A EC, Westphal M, Rehberg S, Kampmeier T, Ligges S, Orecchioni A, D'Egidio A, D'Ippoliti F, Raffone C, Venditti M, Guarracino F, Girardis M, Tritapepe L, Pietropaoli P, Mebazaa A, Singer M. Effect of heart rate control with esmolol on hemodynamic and clinical outcomes in patients with septic shock: a randomized clinical trial. *JAMA* 2013;310(16):1683-91.
14. Balik M RJ, Leden P, Zakharchenko M, Otahal M, Bartakova H, Korinek J. Concomitant use of beta-1 adrenoceptor blocker and norepinephrine in patients with septic shock. *Wien Klin Wochenschr* 2012;124:552-56.
15. Balik M RJ, Leden P, Zakharchenko M, Otahal M, Bartakova H, Korinek J. Concomitant use of beta-1 adrenoceptor blocker and norepinephrine in patients with septic shock. Reply to a letter to the authors. *Wien Klin Wochenschr* 2014;126(7-8):246-47.



1  
2  
3  
4  
5  
6  
7  
8  
9  
10  
11  
12  
13  
14  
15  
16  
17  
18  
19  
20  
21  
22  
23  
24  
25  
26  
27  
28  
29  
30  
31  
32  
33  
34  
35  
36  
37  
38  
39  
40  
41  
42  
43  
44  
45  
46  
47  
48  
49  
50  
51  
52  
53  
54  
55  
56  
57  
58  
59  
60

16. McLean AS TF, Vieillard-Baron A. Beta-blockers in septic shock to optimize hemodynamics? No. *Intensive Care Med* 2016 doi: DOI 10.1007/s00134-016-4407-3 [published Online First: 27.6.2016]
17. Arrigo M BD, Rudiger A. Management of atrial fibrillation in critically ill patients. *Crit Care Res Pract* 2014;2014(840615) doi: doi: 10.1155/2014/840615
18. Kirchhof P AB, Darius H, De Caterina R, Le Heuzey JY, Schilling RJ, Schmitt J, Zamorano JL. Management of atrial fibrillation in seven European countries after the publication of the 2010 ESC Guidelines on atrial fibrillation: primary results of the PREvention of thromboemolic events--European Registry in Atrial Fibrillation (PREFER in AF). *Europace* 2014;16(1):6-14.
19. Sleswijk ME VNT, Tulleken JE, Ligtenberg JJ, Girbes AR, Zijlstra JG. Clinical review: treatment of new-onset atrial fibrillation in medical intensive care patients - a clinical framework. *Crit Care* 2007;11(6):233.
20. Arrigo M JN, Seifert B, Spahn DR, Bettex D, Rudiger A. Disappointing Success of Electrical Cardioversion for New-Onset Atrial Fibrillation in Cardiosurgical ICU Patients. *Crit Care Med* 2015;43(11):2354-59.
21. Hassan S, Ayoub W, Hassan M, et al. Amiodarone-induced myxoedema coma. *BMJ case reports* 2014;2014 doi: 10.1136/bcr-2013-202338 [published Online First: 2014/04/15]
22. Hofmann A NC, Ofluoglu S, Holzmannhofer J, Strohmmer B, Pirich C. Incidence and predictability of amiodarone-induced thyrotoxicosis and hypothyroidism. *Wien Klin Wochenschr* 2008;120(15-16):493-98.
23. Jaiswal P, Attar BM, Yap JE, et al. Acute liver failure with amiodarone infusion: A case report and systematic review. *Journal of clinical pharmacy and therapeutics* 2017 doi: 10.1111/jcpt.12594 [published Online First: 2017/07/18]
24. Ratz Bravo AE, Drewe J, Schlienger RG, et al. Hepatotoxicity during rapid intravenous loading with amiodarone: Description of three cases and review of the literature. *Critical care medicine* 2005;33(1):128-34; discussion 245-6. [published Online First: 2005/01/13]
25. Charles PE, Doise JM, Quenot JP, et al. Amiodarone-related acute respiratory distress syndrome following sudden withdrawal of steroids. *Respiration; international review of thoracic diseases* 2006;73(2):248-9. doi: 10.1159/000088010 [published Online First: 2005/09/01]
26. Singh VK, Maheshwari V. Acute Respiratory Distress Syndrome Complicated by Amiodarone Induced Pulmonary Fibrosis: Don't Let Your Guard Down. *Journal of clinical and diagnostic research : JCDR* 2017;11(4):Ud01-ud02. doi: 10.7860/jcdr/2017/24710.9674 [published Online First: 2017/06/03]
27. Hughes M, Binning A. Intravenous amiodarone in intensive care. Time for a reappraisal? *Intensive care medicine* 2000;26(12):1730-9. [published Online First: 2001/03/29]
28. Papiris SA, Triantafillidou C, Kolilekas L, et al. Amiodarone: review of pulmonary effects and toxicity. *Drug safety* 2010;33(7):539-58. doi: 10.2165/11532320-000000000-00000 [published Online First: 2010/06/18]
29. Allen LaPointe NM, Dai D, Thomas L, et al. Antiarrhythmic drug use in patients <65 years with atrial fibrillation and without structural heart disease. *The American journal of cardiology* 2015;115(3):316-22. doi: 10.1016/j.amjcard.2014.11.005 [published Online First: 2014/12/11]
30. Gwag HB, Chun KJ, Hwang JK, et al. Which antiarrhythmic drug to choose after electrical cardioversion: A study on non-valvular atrial fibrillation patients. *PloS one* 2018;13(5):e0197352. doi: 10.1371/journal.pone.0197352 [published Online First: 2018/05/23]
31. Kirchhof P, Benussi S, Kotecha D, et al. 2016 ESC Guidelines for the management of atrial fibrillation developed in collaboration with EACTS. *European heart journal* 2016;37(38):2893-962. doi: 10.1093/eurheartj/ehw210 [published Online First: 2016/08/28]

- 1  
2  
3 1 32. Echt DS LP, Mitchell LB, Peters RW, Obias-Manno D, Barker AH, Arensberg D, Baker A, Friedman L,  
4 2 Greene HL, et al. Mortality and morbidity in patients receiving encainide, flecainide, or  
5 3 placebo. The Cardiac Arrhythmia Suppression Trial. *NEJM* 1991;324(12):781-88.  
6 4  
7 4 33. Chevalier P D-DA, Burri H, Cucherat M, Kirkorian G, Touboul P. Amiodarone versus placebo and  
8 5 class Ic drugs for cardioversion of recent-onset atrial fibrillation: a meta-analysis. *Journal of*  
9 6 *the American College of Cardiology* 2003;41(2):255-62.  
10 7  
11 7 34. Courand PY SF, Ranc S, Mullier A, Kirkorian G, Bonnefoy E. Arrhythmogenic effect of flecainide  
12 8 toxicity. *Cardiology Journal* 2013;20(2):203-05.  
13 9  
14 9 35. Aliot E CA, Crijns HJ, Goette A, Tamargo J. Twenty-five years in the making: flecainide is safe and  
15 10 effective for the management of atrial fibrillation. *Europace* 2011;13(2):161-73.  
16 11  
17 11 36. Varon J, Marik PE. Irwin and Rippe's intensive care medicine. In: Irwin RS, Rippe JM, eds. 6th ed.  
18 12 Philadelphia: Wolters Kluwer Health/Lippincott Williams & Wilkins 2008:1855-69.  
19 13  
20 13 37. Ganetsky M BE. Antiarrhythmic agents. In: Irwin RS RJ, ed. Intensive care medicine. 6th ed.  
21 14 Philadelphia: Wolters Kluwer/Lippincott, Williams&Wilkins 2008:1486-98.  
22 15  
23 15 38. Stoschitzky K, Stoschitzky G, Lercher P, et al. Propafenone shows class Ic and class II  
24 16 antiarrhythmic effects. *Europace* 2016;18(4):568-71. doi: 10.1093/europace/euv195  
25 17 [published Online First: 2015/06/10]  
26 18  
27 18 39. Lafuente-Lafuente C, Valembos L, Bergmann JF, et al. Antiarrhythmics for maintaining sinus  
28 19 rhythm after cardioversion of atrial fibrillation. *The Cochrane database of systematic reviews*  
29 20 2015(3):Cd005049. doi: 10.1002/14651858.CD005049.pub4 [published Online First:  
30 21 2015/03/31]  
31 22  
32 22 40. Bonora A, Turcato G, Franchi E, et al. Efficacy and safety in pharmacological cardioversion of  
33 23 recent-onset atrial fibrillation: a propensity score matching to compare amiodarone vs class  
34 24 IC antiarrhythmic drugs. *Internal and emergency medicine* 2017;12(6):853-59. doi:  
35 25 10.1007/s11739-016-1497-4 [published Online First: 2016/07/08]  
36 26  
37 26 41. Van Gelder IC, Hagens VE, Bosker HA, et al. A comparison of rate control and rhythm control in  
38 27 patients with recurrent persistent atrial fibrillation. *The New England journal of medicine*  
39 28 2002;347(23):1834-40. doi: 10.1056/NEJMoa021375 [published Online First: 2002/12/06]  
40 29  
41 29 42. Wyse DG, Waldo AL, DiMarco JP, et al. A comparison of rate control and rhythm control in  
42 30 patients with atrial fibrillation. *The New England journal of medicine* 2002;347(23):1825-33.  
43 31 doi: 10.1056/NEJMoa021328 [published Online First: 2002/12/06]  
44 32  
45 32 43. ARISE Investigators; ANZICS Clinical Trials Group PS, Delaney A, Bailey M, Bellomo R, Cameron PA,  
46 33 Cooper DJ, Higgins AM, Holdgate A, Howe BD, Webb SA, Williams P. Goal-directed  
47 34 resuscitation for patients with early septic shock. *NEJM* 2014;371(16):1496-506.  
48 35  
49 35 44. Chung CS, Kovacs SJ. Consequences of increasing heart rate on deceleration time, the velocity-  
50 36 time integral, and E/A. *The American journal of cardiology* 2006;97(1):130-6. doi:  
51 37 10.1016/j.amjcard.2005.07.116 [published Online First: 2005/12/27]  
52 38  
53 38 45. Fornengo C AM, Frea S, Gallo C, Grosso Marra W, Morello M, Gaita F. Prediction of atrial  
54 39 fibrillation recurrence after cardioversion in patients with left-atrial dilation. *Eur Heart J*  
55 40 *Cardiovasc Imaging* 2015;16(3):335-41.  
56 41  
57 41 46. Nagueh SF AC, Gillebert TC, Marino PN, Oh JK, Smiseth OA, Waggoner AD, Flachskampf FA,  
58 42 Pellikka PA, Evangelisa A. Recommendations for the evaluation of left ventricular diastolic  
59 43 function by echocardiography. *European journal of echocardiography : the journal of the*  
60 44 *Working Group on Echocardiography of the European Society of Cardiology* 2009;10(2):165-  
93.  
46 47  
47 47 47. Marchese P, Bursi F, Delle Donne G, et al. Indexed left atrial volume predicts the recurrence of  
48 48 non-valvular atrial fibrillation after successful cardioversion. *European journal of*  
49 49 *echocardiography : the journal of the Working Group on Echocardiography of the European*  
50 50 *Society of Cardiology* 2011;12(3):214-21. doi: 10.1093/ejechocard/jeq176 [published Online  
51 51 First: 2010/12/15]  
52 52  
53 51 48. Poelaert J, Declerck C, Vogelaers D, et al. Left ventricular systolic and diastolic function in septic  
54 52 shock. *Intensive care medicine* 1997;23(5):553-60. [published Online First: 1997/05/01]

- 1  
2  
3 1 49. Singer M DC, Seymour CW, Shankar-Hari M, Annane D, Bauer M, Bellomo R, Bernard GR, Chiche  
4 2 JD, Coopersmith CM, Hotchkiss RS, Levy MM, Marshall JC, Martin GS, Opal SM, Rubenfeld  
5 3 GD, van der Poll T, Vincent JL, Angus DC. The Third International Consensus Definitions for  
6 4 Sepsis and Septic Shock (Sepsis-3). *JAMA* 2016;315(8):801-10.  
7 5  
8 50. Repesse X, Charron C, Vieillard-Baron A. Evaluation of left ventricular systolic function revisited in  
9 6 septic shock. *Crit Care* 2013;17(4):164. doi: 10.1186/cc12755 [published Online First:  
10 7 2013/07/06]  
11 8  
12 51. Levy MM, Fink MP, Marshall JC, et al. 2001 SCCM/ESICM/ACCP/ATS/SIS International Sepsis  
13 9 Definitions Conference. *Crit Care Med* 2003;31(4):1250-6.  
14 10  
15 52. Sterling SA, Puskarich MA, Glass AF, et al. The Impact of the Sepsis-3 Septic Shock Definition on  
16 11 Previously Defined Septic Shock Patients. *Critical care medicine* 2017;45(9):1436-42. doi:  
17 12 10.1097/ccm.0000000000002512 [published Online First: 2017/05/26]  
18  
19  
20  
21  
22  
23  
24  
25  
26  
27  
28  
29  
30  
31  
32  
33  
34  
35  
36  
37  
38  
39  
40  
41  
42  
43  
44  
45  
46  
47  
48  
49  
50  
51  
52  
53  
54  
55  
56  
57  
58  
59  
60

For peer review only

1  
2  
3 1  
4  
5 2  
6  
7 3 **Legends to figures**  
8  
9 4

10 5 **Fig.1:** Univariate analysis showing long term survival of the propafenon patients similar to  
11 6 the metoprolol group and higher than in the amiodarone medicated patients in septic shock  
12 7 (HR1.76(1.06; 2.3),p=0.024). Copied from the author's pilot retrospective study <sup>4</sup>  
13 8  
14 8

15 9  
16 9 **Fig.2:** Multivariate analysis showing insignificant 12-month benefit in cardioverting septic  
17 10 shock patients to sinus rhythm (HR0.67,p=0.113). Copied from the author's pilot  
18 11 retrospective study <sup>4</sup>  
19 12  
20 12

21 13  
22 13 **Fig.3:** Flowchart of the study  
23 14  
24 14

25 15  
26 15 **Fig.4:** SPIRIT table for the schedule of enrolment, interventions, and assessments  
27 16  
28 16  
29 17  
30 17  
31 18  
32 18  
33 19  
34 19  
35 20  
36 20  
37  
38  
39  
40  
41  
42  
43  
44  
45  
46  
47  
48  
49  
50  
51  
52  
53  
54  
55  
56  
57  
58  
59  
60

## Kaplan-Meier survival estimates

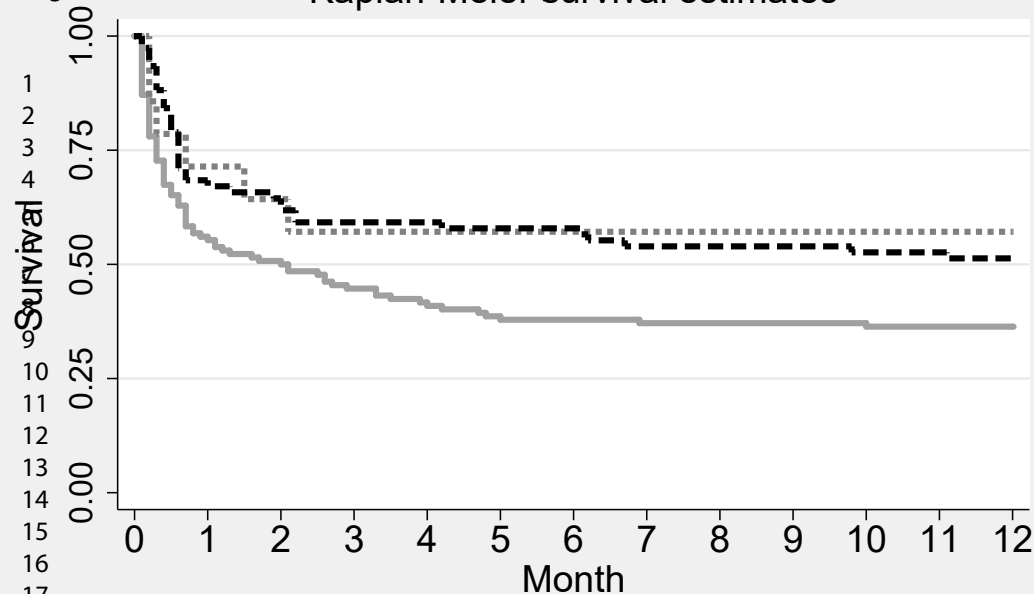

For peer review only - <http://bmjopen.bmj.com/site/about/guidelines.xhtml>

— Amiodarone    ..... Metoprolol    --- Propafenon

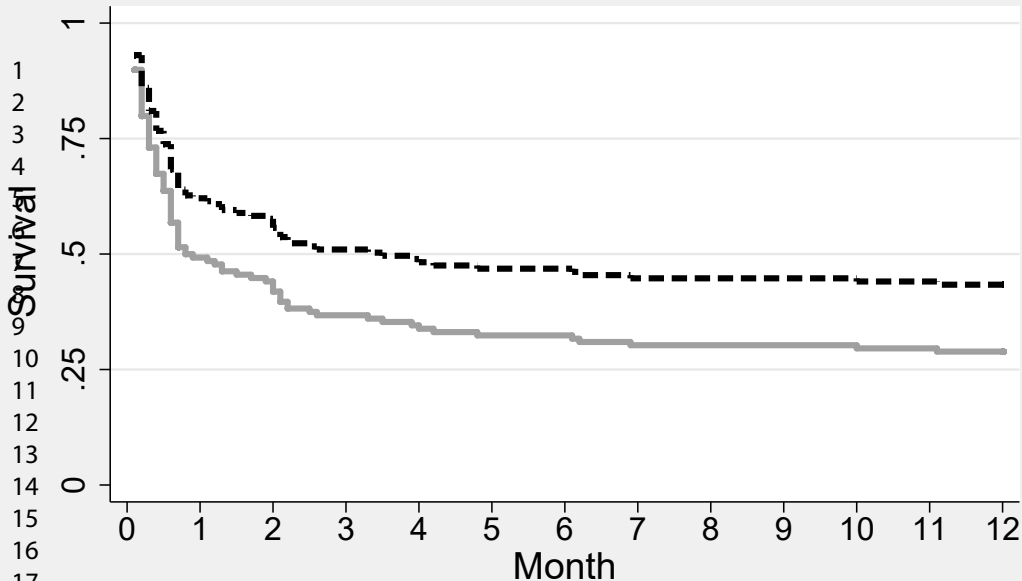

For peer review only - <http://bmjopen.bmj.com/site/about/guidelines.xhtml>

— Persisting arrhythmia      - - - Cardioversion

**Acronym: PRASE – Propafenone versus amiodarone in septic shock**

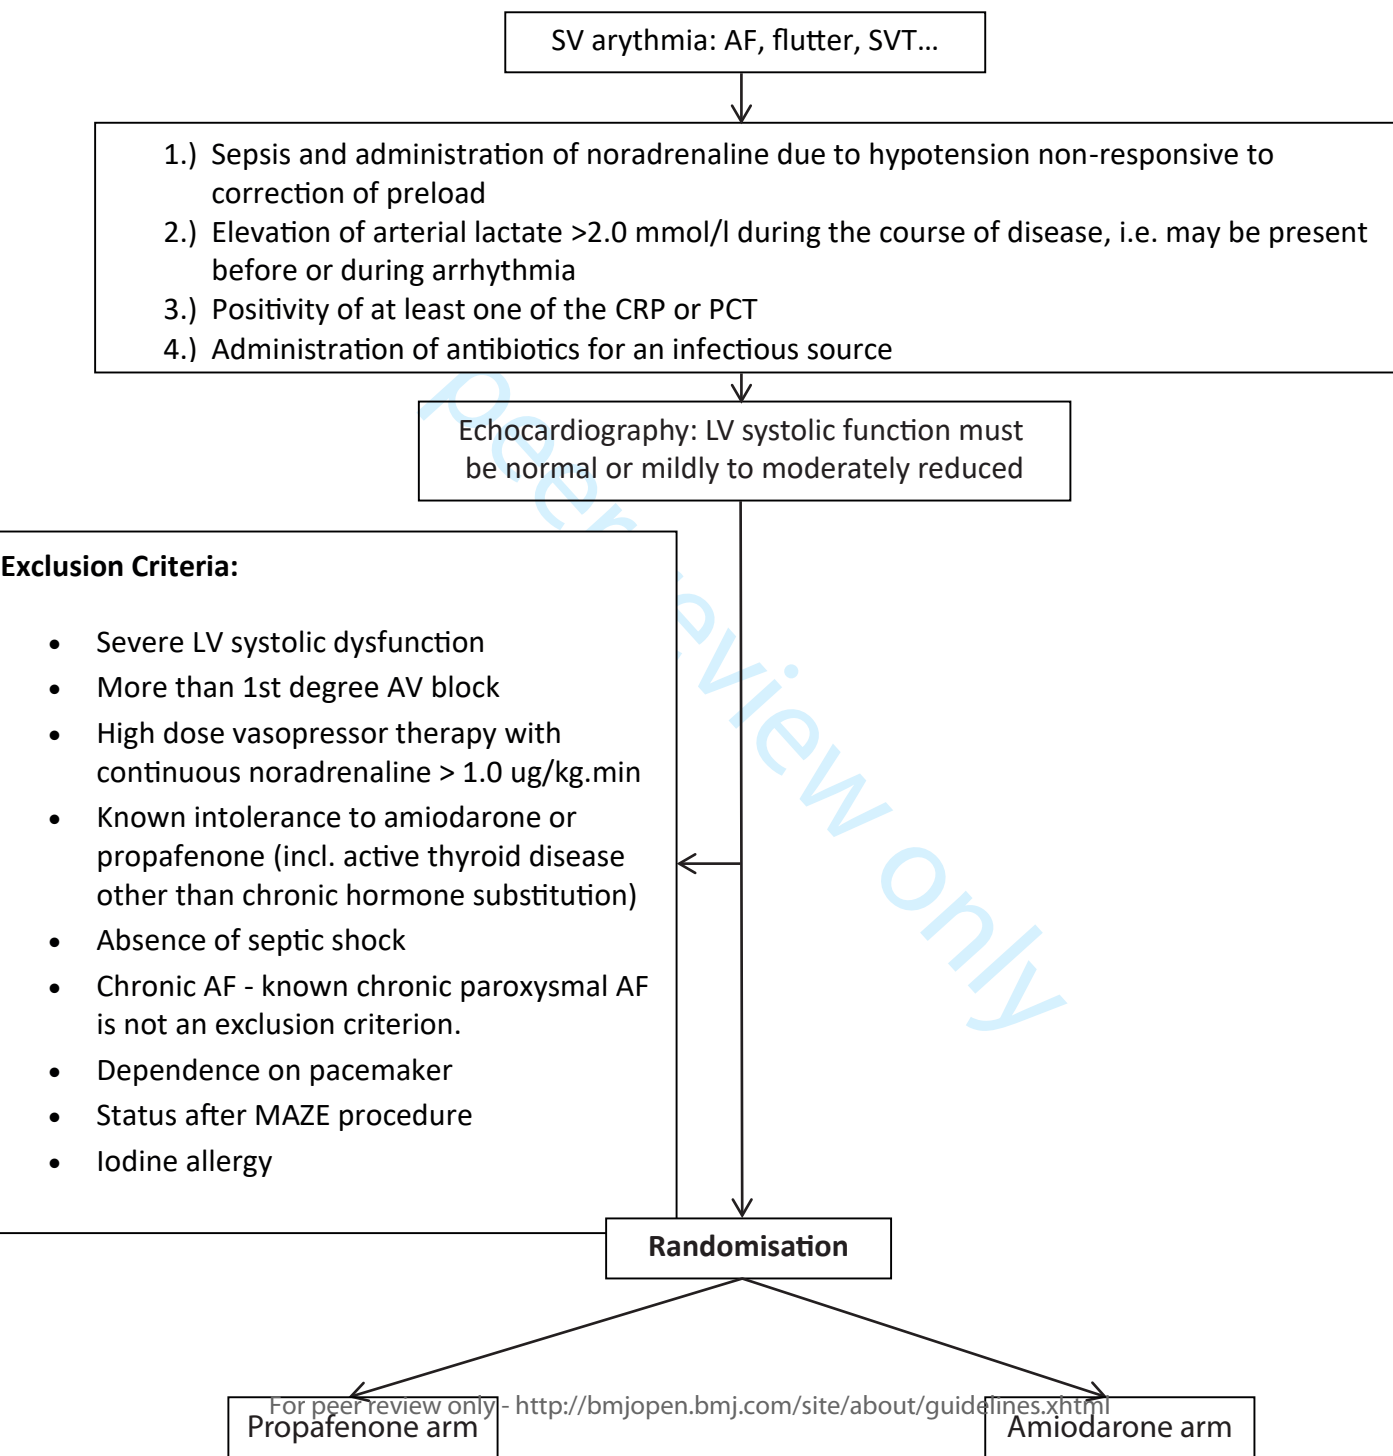

|                                      | Screening | Randomisation through electronic CRF | STUDY PERIOD |             |            |             |                 |             |
|--------------------------------------|-----------|--------------------------------------|--------------|-------------|------------|-------------|-----------------|-------------|
|                                      |           |                                      | Visits       |             |            | ICU outcome | 28-days outcome | 12m-outcome |
| TIMEPOINT                            | $-T_1$    | 0                                    | $T_{+1h}^*$  | $T_{+4h}^*$ | $T_x^{**}$ |             |                 |             |
| Septic shock criteria JAMA 3/2016    | X         |                                      |              |             |            |             |                 |             |
| Informed consent                     | X         |                                      |              |             |            |             |                 |             |
| Allocation                           |           | X                                    |              |             |            |             |                 |             |
| 12-lead ECG                          | X         |                                      | X            | X           | X          |             |                 |             |
| Transthoracic echocardiography (TTE) | X         |                                      | X            | X           | X          |             |                 |             |
| Hemodynamic assessment               | X         |                                      | X            | X           | X          | X***        | X***            | X***        |
| Laboratory data                      | X         |                                      |              |             |            |             |                 |             |
| Concomitant medications              | X         |                                      |              |             |            |             |                 |             |
| <b>INTERVENTIONS:</b>                |           |                                      |              |             |            |             |                 |             |
| Propafenone bolus                    |           | X                                    |              |             |            |             |                 |             |
| Propafenone cont. infusion           |           |                                      | X            | X           | X          |             |                 |             |
| Amiodarone bolus                     |           | X                                    |              |             |            |             |                 |             |
| Amiodarone cont. infusion            |           |                                      | X            | X           | X          |             |                 |             |

\*Visits: 12-lead ECG every 12h on infusion, TTE per 24h of arrhythmia and +1h after cardioversion, +4h after cardioversion, TTE in any instability

\*\*  $T_x$  – day on antiarrhythmic infusion

\*\*\* Alive/dead, sinus/persistent arrhythmia



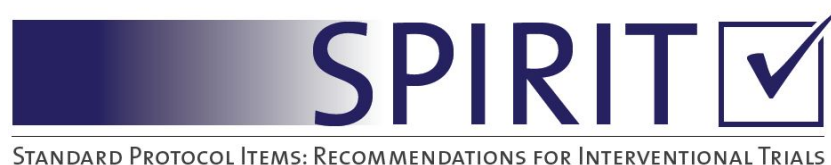

STANDARD PROTOCOL ITEMS: RECOMMENDATIONS FOR INTERVENTIONAL TRIALS

SPIRIT 2013 Checklist: Recommended items to address in a clinical trial protocol and related documents\*

| Section/item                      | Item No | Description                                                                                                                                                                                                                                                                              | Addressed on page number |
|-----------------------------------|---------|------------------------------------------------------------------------------------------------------------------------------------------------------------------------------------------------------------------------------------------------------------------------------------------|--------------------------|
| <b>Administrative information</b> |         |                                                                                                                                                                                                                                                                                          |                          |
| Title                             | 1       | Descriptive title identifying the study design, population, interventions, and, if applicable, trial acronym                                                                                                                                                                             | ___1___                  |
| Trial registration                | 2a      | Trial identifier and registry name. If not yet registered, name of intended registry                                                                                                                                                                                                     | ___1___                  |
|                                   | 2b      | All items from the World Health Organization Trial Registration Data Set                                                                                                                                                                                                                 | ___1, 2, 10_             |
| Protocol version                  | 3       | Date and version identifier                                                                                                                                                                                                                                                              | ___2___                  |
| Funding                           | 4       | Sources and types of financial, material, and other support                                                                                                                                                                                                                              | ___11,12___              |
| Roles and responsibilities        | 5a      | Names, affiliations, and roles of protocol contributors                                                                                                                                                                                                                                  | ___1, 11___              |
|                                   | 5b      | Name and contact information for the trial sponsor                                                                                                                                                                                                                                       | ___12___                 |
|                                   | 5c      | Role of study sponsor and funders, if any, in study design; collection, management, analysis, and interpretation of data; writing of the report; and the decision to submit the report for publication, including whether they will have ultimate authority over any of these activities | ___12___                 |
|                                   | 5d      | Composition, roles, and responsibilities of the coordinating centre, steering committee, endpoint adjudication committee, data management team, and other individuals or groups overseeing the trial, if applicable (see Item 21a for data monitoring committee)                         | ___2,10___               |

1 **Introduction**

2

3 Background and rationale 6a Description of research question and justification for undertaking the trial, including summary of relevant studies (published and unpublished) examining benefits and harms for each intervention \_\_\_ 3,4,5 \_\_\_

4

5

6 6b Explanation for choice of comparators \_\_\_ 3,4,5 \_\_\_

7

8 Objectives 7 Specific objectives or hypotheses \_\_\_ 5, 6 \_\_\_

9

10 Trial design 8 Description of trial design including type of trial (eg, parallel group, crossover, factorial, single group), allocation ratio, and framework (eg, superiority, equivalence, noninferiority, exploratory) \_\_\_ 5, 6 \_\_\_

11

12

13

14 **Methods: Participants, interventions, and outcomes**

15

16 Study setting 9 Description of study settings (eg, community clinic, academic hospital) and list of countries where data will be collected. Reference to where list of study sites can be obtained \_\_\_ 6 \_\_\_

17

18

19 Eligibility criteria 10 Inclusion and exclusion criteria for participants. If applicable, eligibility criteria for study centres and individuals who will perform the interventions (eg, surgeons, psychotherapists) \_\_\_ 6, 7 \_\_\_

20

21

22 Interventions 11a Interventions for each group with sufficient detail to allow replication, including how and when they will be administered \_\_\_ 7, 8, 9 \_\_\_

23

24

25 11b Criteria for discontinuing or modifying allocated interventions for a given trial participant (eg, drug dose change in response to harms, participant request, or improving/worsening disease) \_\_\_ 7, 8, 9 \_\_\_

26

27

28 11c Strategies to improve adherence to intervention protocols, and any procedures for monitoring adherence (eg, drug tablet return, laboratory tests) \_\_\_ 7, 8, 9 \_\_\_

29

30

31 11d Relevant concomitant care and interventions that are permitted or prohibited during the trial \_\_\_ 7, 8, 9 \_\_\_

32

33

34 Outcomes 12 Primary, secondary, and other outcomes, including the specific measurement variable (eg, systolic blood pressure), analysis metric (eg, change from baseline, final value, time to event), method of aggregation (eg, median, proportion), and time point for each outcome. Explanation of the clinical relevance of chosen efficacy and harm outcomes is strongly recommended \_\_\_ 8, 9 \_\_\_

35

36

37

38

39

40 Participant timeline 13 Time schedule of enrolment, interventions (including any run-ins and washouts), assessments, and visits for participants. A schematic diagram is highly recommended (see Figure) \_\_\_ 7, 8, Fig.3, Fig.4 \_\_\_

41

42

43

44

45

46

|    |                                                                     |     |                                                                                                                                                                                                                                                                                                                                                                                                              |                |
|----|---------------------------------------------------------------------|-----|--------------------------------------------------------------------------------------------------------------------------------------------------------------------------------------------------------------------------------------------------------------------------------------------------------------------------------------------------------------------------------------------------------------|----------------|
| 1  | Sample size                                                         | 14  | Estimated number of participants needed to achieve study objectives and how it was determined, including clinical and statistical assumptions supporting any sample size calculations                                                                                                                                                                                                                        | ___2, 9, 10___ |
| 2  |                                                                     |     |                                                                                                                                                                                                                                                                                                                                                                                                              |                |
| 3  |                                                                     |     |                                                                                                                                                                                                                                                                                                                                                                                                              |                |
| 4  | Recruitment                                                         | 15  | Strategies for achieving adequate participant enrolment to reach target sample size                                                                                                                                                                                                                                                                                                                          | ___5,6,7,8___  |
| 5  |                                                                     |     |                                                                                                                                                                                                                                                                                                                                                                                                              |                |
| 6  |                                                                     |     |                                                                                                                                                                                                                                                                                                                                                                                                              |                |
| 7  | <b>Methods: Assignment of interventions (for controlled trials)</b> |     |                                                                                                                                                                                                                                                                                                                                                                                                              |                |
| 8  | Allocation:                                                         |     |                                                                                                                                                                                                                                                                                                                                                                                                              |                |
| 9  |                                                                     |     |                                                                                                                                                                                                                                                                                                                                                                                                              |                |
| 10 | Sequence generation                                                 | 16a | Method of generating the allocation sequence (eg, computer-generated random numbers), and list of any factors for stratification. To reduce predictability of a random sequence, details of any planned restriction (eg, blocking) should be provided in a separate document that is unavailable to those who enrol participants or assign interventions                                                     | ___7, 8, 9___  |
| 11 |                                                                     |     |                                                                                                                                                                                                                                                                                                                                                                                                              |                |
| 12 |                                                                     |     |                                                                                                                                                                                                                                                                                                                                                                                                              |                |
| 13 |                                                                     |     |                                                                                                                                                                                                                                                                                                                                                                                                              |                |
| 14 |                                                                     |     |                                                                                                                                                                                                                                                                                                                                                                                                              |                |
| 15 |                                                                     |     |                                                                                                                                                                                                                                                                                                                                                                                                              |                |
| 16 | Allocation concealment mechanism                                    | 16b | Mechanism of implementing the allocation sequence (eg, central telephone; sequentially numbered, opaque, sealed envelopes), describing any steps to conceal the sequence until interventions are assigned                                                                                                                                                                                                    | ___7, 8, 9___  |
| 17 |                                                                     |     |                                                                                                                                                                                                                                                                                                                                                                                                              |                |
| 18 |                                                                     |     |                                                                                                                                                                                                                                                                                                                                                                                                              |                |
| 19 |                                                                     |     |                                                                                                                                                                                                                                                                                                                                                                                                              |                |
| 20 | Implementation                                                      | 16c | Who will generate the allocation sequence, who will enrol participants, and who will assign participants to interventions                                                                                                                                                                                                                                                                                    | ___7, 8, 9___  |
| 21 |                                                                     |     |                                                                                                                                                                                                                                                                                                                                                                                                              |                |
| 22 |                                                                     |     |                                                                                                                                                                                                                                                                                                                                                                                                              |                |
| 23 |                                                                     |     |                                                                                                                                                                                                                                                                                                                                                                                                              |                |
| 24 | Blinding (masking)                                                  | 17a | Who will be blinded after assignment to interventions (eg, trial participants, care providers, outcome assessors, data analysts), and how                                                                                                                                                                                                                                                                    | ___7, 8, 9___  |
| 25 |                                                                     |     |                                                                                                                                                                                                                                                                                                                                                                                                              |                |
| 26 |                                                                     |     |                                                                                                                                                                                                                                                                                                                                                                                                              |                |
| 27 |                                                                     | 17b | If blinded, circumstances under which unblinding is permissible, and procedure for revealing a participant's allocated intervention during the trial                                                                                                                                                                                                                                                         | ___7, 8, 9___  |
| 28 |                                                                     |     |                                                                                                                                                                                                                                                                                                                                                                                                              |                |
| 29 |                                                                     |     |                                                                                                                                                                                                                                                                                                                                                                                                              |                |
| 30 |                                                                     |     |                                                                                                                                                                                                                                                                                                                                                                                                              |                |
| 31 | <b>Methods: Data collection, management, and analysis</b>           |     |                                                                                                                                                                                                                                                                                                                                                                                                              |                |
| 32 |                                                                     |     |                                                                                                                                                                                                                                                                                                                                                                                                              |                |
| 33 | Data collection methods                                             | 18a | Plans for assessment and collection of outcome, baseline, and other trial data, including any related processes to promote data quality (eg, duplicate measurements, training of assessors) and a description of study instruments (eg, questionnaires, laboratory tests) along with their reliability and validity, if known. Reference to where data collection forms can be found, if not in the protocol | ___8, 9, 12___ |
| 34 |                                                                     |     |                                                                                                                                                                                                                                                                                                                                                                                                              |                |
| 35 |                                                                     |     |                                                                                                                                                                                                                                                                                                                                                                                                              |                |
| 36 |                                                                     |     |                                                                                                                                                                                                                                                                                                                                                                                                              |                |
| 37 |                                                                     |     |                                                                                                                                                                                                                                                                                                                                                                                                              |                |
| 38 |                                                                     |     |                                                                                                                                                                                                                                                                                                                                                                                                              |                |
| 39 |                                                                     | 18b | Plans to promote participant retention and complete follow-up, including list of any outcome data to be collected for participants who discontinue or deviate from intervention protocols                                                                                                                                                                                                                    | ___8, 9___     |
| 40 |                                                                     |     |                                                                                                                                                                                                                                                                                                                                                                                                              |                |
| 41 |                                                                     |     |                                                                                                                                                                                                                                                                                                                                                                                                              |                |
| 42 |                                                                     |     |                                                                                                                                                                                                                                                                                                                                                                                                              |                |
| 43 |                                                                     |     |                                                                                                                                                                                                                                                                                                                                                                                                              |                |
| 44 |                                                                     |     |                                                                                                                                                                                                                                                                                                                                                                                                              |                |
| 45 |                                                                     |     |                                                                                                                                                                                                                                                                                                                                                                                                              |                |
| 46 |                                                                     |     |                                                                                                                                                                                                                                                                                                                                                                                                              |                |

|    |                                 |     |                                                                                                                                                                                                                                                                                                                                       |                     |
|----|---------------------------------|-----|---------------------------------------------------------------------------------------------------------------------------------------------------------------------------------------------------------------------------------------------------------------------------------------------------------------------------------------|---------------------|
| 1  | Data management                 | 19  | Plans for data entry, coding, security, and storage, including any related processes to promote data quality (eg, double data entry; range checks for data values). Reference to where details of data management procedures can be found, if not in the protocol                                                                     | ___7,8,9,10_        |
| 2  |                                 |     |                                                                                                                                                                                                                                                                                                                                       |                     |
| 3  |                                 |     |                                                                                                                                                                                                                                                                                                                                       |                     |
| 4  |                                 |     |                                                                                                                                                                                                                                                                                                                                       |                     |
| 5  | Statistical methods             | 20a | Statistical methods for analysing primary and secondary outcomes. Reference to where other details of the statistical analysis plan can be found, if not in the protocol                                                                                                                                                              | ___9,10___          |
| 6  |                                 |     |                                                                                                                                                                                                                                                                                                                                       |                     |
| 7  |                                 |     |                                                                                                                                                                                                                                                                                                                                       |                     |
| 8  |                                 | 20b | Methods for any additional analyses (eg, subgroup and adjusted analyses)                                                                                                                                                                                                                                                              | ___5, 6, 7, 8, 9, _ |
| 9  |                                 |     |                                                                                                                                                                                                                                                                                                                                       |                     |
| 10 |                                 | 20c | Definition of analysis population relating to protocol non-adherence (eg, as randomised analysis), and any statistical methods to handle missing data (eg, multiple imputation)                                                                                                                                                       | ___9,10___          |
| 11 |                                 |     |                                                                                                                                                                                                                                                                                                                                       |                     |
| 12 |                                 |     |                                                                                                                                                                                                                                                                                                                                       |                     |
| 13 |                                 |     |                                                                                                                                                                                                                                                                                                                                       |                     |
| 14 | <b>Methods: Monitoring</b>      |     |                                                                                                                                                                                                                                                                                                                                       |                     |
| 15 |                                 |     |                                                                                                                                                                                                                                                                                                                                       |                     |
| 16 | Data monitoring                 | 21a | Composition of data monitoring committee (DMC); summary of its role and reporting structure; statement of whether it is independent from the sponsor and competing interests; and reference to where further details about its charter can be found, if not in the protocol. Alternatively, an explanation of why a DMC is not needed | ___9, 10___         |
| 17 |                                 |     |                                                                                                                                                                                                                                                                                                                                       |                     |
| 18 |                                 |     |                                                                                                                                                                                                                                                                                                                                       |                     |
| 19 |                                 |     |                                                                                                                                                                                                                                                                                                                                       |                     |
| 20 |                                 |     |                                                                                                                                                                                                                                                                                                                                       |                     |
| 21 |                                 |     |                                                                                                                                                                                                                                                                                                                                       |                     |
| 22 |                                 | 21b | Description of any interim analyses and stopping guidelines, including who will have access to these interim results and make the final decision to terminate the trial                                                                                                                                                               | ___9, 10___         |
| 23 |                                 |     |                                                                                                                                                                                                                                                                                                                                       |                     |
| 24 |                                 |     |                                                                                                                                                                                                                                                                                                                                       |                     |
| 25 | Harms                           | 22  | Plans for collecting, assessing, reporting, and managing solicited and spontaneously reported adverse events and other unintended effects of trial interventions or trial conduct                                                                                                                                                     | ___9, 10___         |
| 26 |                                 |     |                                                                                                                                                                                                                                                                                                                                       |                     |
| 27 |                                 |     |                                                                                                                                                                                                                                                                                                                                       |                     |
| 28 | Auditing                        | 23  | Frequency and procedures for auditing trial conduct, if any, and whether the process will be independent from investigators and the sponsor                                                                                                                                                                                           | ___9, 10___         |
| 29 |                                 |     |                                                                                                                                                                                                                                                                                                                                       |                     |
| 30 |                                 |     |                                                                                                                                                                                                                                                                                                                                       |                     |
| 31 |                                 |     |                                                                                                                                                                                                                                                                                                                                       |                     |
| 32 | <b>Ethics and dissemination</b> |     |                                                                                                                                                                                                                                                                                                                                       |                     |
| 33 |                                 |     |                                                                                                                                                                                                                                                                                                                                       |                     |
| 34 | Research ethics approval        | 24  | Plans for seeking research ethics committee/institutional review board (REC/IRB) approval                                                                                                                                                                                                                                             | ___10___            |
| 35 |                                 |     |                                                                                                                                                                                                                                                                                                                                       |                     |
| 36 |                                 |     |                                                                                                                                                                                                                                                                                                                                       |                     |
| 37 | Protocol amendments             | 25  | Plans for communicating important protocol modifications (eg, changes to eligibility criteria, outcomes, analyses) to relevant parties (eg, investigators, REC/IRBs, trial participants, trial registries, journals, regulators)                                                                                                      | ___2, 10___         |
| 38 |                                 |     |                                                                                                                                                                                                                                                                                                                                       |                     |
| 39 |                                 |     |                                                                                                                                                                                                                                                                                                                                       |                     |
| 40 |                                 |     |                                                                                                                                                                                                                                                                                                                                       |                     |
| 41 |                                 |     |                                                                                                                                                                                                                                                                                                                                       |                     |
| 42 |                                 |     |                                                                                                                                                                                                                                                                                                                                       |                     |
| 43 |                                 |     |                                                                                                                                                                                                                                                                                                                                       |                     |
| 44 |                                 |     |                                                                                                                                                                                                                                                                                                                                       |                     |
| 45 |                                 |     |                                                                                                                                                                                                                                                                                                                                       |                     |
| 46 |                                 |     |                                                                                                                                                                                                                                                                                                                                       |                     |

|    |                               |     |                                                                                                                                                                                                                                                                                     |                                       |
|----|-------------------------------|-----|-------------------------------------------------------------------------------------------------------------------------------------------------------------------------------------------------------------------------------------------------------------------------------------|---------------------------------------|
| 1  | Consent or assent             | 26a | Who will obtain informed consent or assent from potential trial participants or authorised surrogates, and how (see Item 32)                                                                                                                                                        | _____ 10 _____                        |
| 2  |                               |     |                                                                                                                                                                                                                                                                                     |                                       |
| 3  |                               |     |                                                                                                                                                                                                                                                                                     |                                       |
| 4  |                               | 26b | Additional consent provisions for collection and use of participant data and biological specimens in ancillary studies, if applicable                                                                                                                                               | _____ N/A _____                       |
| 5  |                               |     |                                                                                                                                                                                                                                                                                     |                                       |
| 6  |                               |     |                                                                                                                                                                                                                                                                                     |                                       |
| 7  | Confidentiality               | 27  | How personal information about potential and enrolled participants will be collected, shared, and maintained in order to protect confidentiality before, during, and after the trial                                                                                                | _____ 10 _____                        |
| 8  |                               |     |                                                                                                                                                                                                                                                                                     |                                       |
| 9  |                               |     |                                                                                                                                                                                                                                                                                     |                                       |
| 10 | Declaration of interests      | 28  | Financial and other competing interests for principal investigators for the overall trial and each study site                                                                                                                                                                       | _____ 11,12 _____                     |
| 11 |                               |     |                                                                                                                                                                                                                                                                                     |                                       |
| 12 |                               |     |                                                                                                                                                                                                                                                                                     |                                       |
| 13 | Access to data                | 29  | Statement of who will have access to the final trial dataset, and disclosure of contractual agreements that limit such access for investigators                                                                                                                                     | _____ 2, 10 _____                     |
| 14 |                               |     |                                                                                                                                                                                                                                                                                     |                                       |
| 15 |                               |     |                                                                                                                                                                                                                                                                                     |                                       |
| 16 | Ancillary and post-trial care | 30  | Provisions, if any, for ancillary and post-trial care, and for compensation to those who suffer harm from trial participation                                                                                                                                                       | _____ N/A _____                       |
| 17 |                               |     |                                                                                                                                                                                                                                                                                     |                                       |
| 18 |                               |     |                                                                                                                                                                                                                                                                                     |                                       |
| 19 |                               |     |                                                                                                                                                                                                                                                                                     |                                       |
| 20 | Dissemination policy          | 31a | Plans for investigators and sponsor to communicate trial results to participants, healthcare professionals, the public, and other relevant groups (eg, via publication, reporting in results databases, or other data sharing arrangements), including any publication restrictions | _____ 2,12 _____                      |
| 21 |                               |     |                                                                                                                                                                                                                                                                                     |                                       |
| 22 |                               |     |                                                                                                                                                                                                                                                                                     |                                       |
| 23 |                               |     |                                                                                                                                                                                                                                                                                     |                                       |
| 24 |                               | 31b | Authorship eligibility guidelines and any intended use of professional writers                                                                                                                                                                                                      | _____ N/A _____                       |
| 25 |                               |     |                                                                                                                                                                                                                                                                                     |                                       |
| 26 |                               | 31c | Plans, if any, for granting public access to the full protocol, participant-level dataset, and statistical code                                                                                                                                                                     | _____ N/A _____                       |
| 27 |                               |     |                                                                                                                                                                                                                                                                                     |                                       |
| 28 |                               |     |                                                                                                                                                                                                                                                                                     |                                       |
| 29 | <b>Appendices</b>             |     |                                                                                                                                                                                                                                                                                     |                                       |
| 30 |                               |     |                                                                                                                                                                                                                                                                                     |                                       |
| 31 | Informed consent materials    | 32  | Model consent form and other related documentation given to participants and authorised surrogates                                                                                                                                                                                  | _available upon request in Czech_____ |
| 32 |                               |     |                                                                                                                                                                                                                                                                                     |                                       |
| 33 |                               |     |                                                                                                                                                                                                                                                                                     |                                       |
| 34 |                               |     |                                                                                                                                                                                                                                                                                     |                                       |
| 35 | Biological specimens          | 33  | Plans for collection, laboratory evaluation, and storage of biological specimens for genetic or molecular analysis in the current trial and for future use in ancillary studies, if applicable                                                                                      | _____ N/A _____                       |
| 36 |                               |     |                                                                                                                                                                                                                                                                                     |                                       |
| 37 |                               |     |                                                                                                                                                                                                                                                                                     |                                       |

38  
39 \*It is strongly recommended that this checklist be read in conjunction with the SPIRIT 2013 Explanation & Elaboration for important clarification on the items.  
40 Amendments to the protocol should be tracked and dated. The SPIRIT checklist is copyrighted by the SPIRIT Group under the Creative Commons  
41 "[Attribution-NonCommercial-NoDerivs 3.0 Unported](https://creativecommons.org/licenses/by-nc-nd/3.0/)" license.  
42

# BMJ Open

## **Efficacy and safety of 1c class antiarrhythmic agent (propafenone) for supraventricular arrhythmias in septic shock compared to amiodarone: protocol of a prospective randomized double-blind study**

|                                 |                                                                                                                                                                                                                                                                                                                                                                                                                                                                                                                                                                                                                                                                                                                                                                                                                                                                                                                                                                                                                                                                                                                                                                                                                                                                                                                                                                                                                                                                                                                                                                                                                                                                                                                                                                                     |
|---------------------------------|-------------------------------------------------------------------------------------------------------------------------------------------------------------------------------------------------------------------------------------------------------------------------------------------------------------------------------------------------------------------------------------------------------------------------------------------------------------------------------------------------------------------------------------------------------------------------------------------------------------------------------------------------------------------------------------------------------------------------------------------------------------------------------------------------------------------------------------------------------------------------------------------------------------------------------------------------------------------------------------------------------------------------------------------------------------------------------------------------------------------------------------------------------------------------------------------------------------------------------------------------------------------------------------------------------------------------------------------------------------------------------------------------------------------------------------------------------------------------------------------------------------------------------------------------------------------------------------------------------------------------------------------------------------------------------------------------------------------------------------------------------------------------------------|
| Journal:                        | <i>BMJ Open</i>                                                                                                                                                                                                                                                                                                                                                                                                                                                                                                                                                                                                                                                                                                                                                                                                                                                                                                                                                                                                                                                                                                                                                                                                                                                                                                                                                                                                                                                                                                                                                                                                                                                                                                                                                                     |
| Manuscript ID                   | bmjopen-2019-031678.R1                                                                                                                                                                                                                                                                                                                                                                                                                                                                                                                                                                                                                                                                                                                                                                                                                                                                                                                                                                                                                                                                                                                                                                                                                                                                                                                                                                                                                                                                                                                                                                                                                                                                                                                                                              |
| Article Type:                   | Protocol                                                                                                                                                                                                                                                                                                                                                                                                                                                                                                                                                                                                                                                                                                                                                                                                                                                                                                                                                                                                                                                                                                                                                                                                                                                                                                                                                                                                                                                                                                                                                                                                                                                                                                                                                                            |
| Date Submitted by the Author:   | 06-Aug-2019                                                                                                                                                                                                                                                                                                                                                                                                                                                                                                                                                                                                                                                                                                                                                                                                                                                                                                                                                                                                                                                                                                                                                                                                                                                                                                                                                                                                                                                                                                                                                                                                                                                                                                                                                                         |
| Complete List of Authors:       | <p>Balik, Martin; 1st Medical Faculty, Charles University in Prague, Anaesthesia and Intensive Care<br/> Waldauf, Petr; University Hospital Kralovske Vinohrady, Anaesthesia and Intensive Care<br/> Maly, Michal; 1st Medical Faculty, Charles University in Prague, Anaesthesia and Intensive Care<br/> Matousek, Vojtech; 1st Medical Faculty, Charles University in Prague, Anaesthesia and Intensive Care<br/> Brozek, Tomas; 1st Medical Faculty, Charles University in Prague, Anaesthesia and Intensive Care<br/> Rulisek, Jan; 1st Medical Faculty, Charles University in Prague, Anaesthesia and Intensive Care<br/> Porizka, Michal; 1st Medical Faculty, Charles University in Prague, Anaesthesia and Intensive Care<br/> Sachl, Robert; 1st Medical Faculty, Charles University in Prague, Anaesthesia and Intensive Care<br/> Otahal, Michal; 1st Medical Faculty, Charles University in Prague, Anaesthesia and Intensive Care<br/> Brestovansky, Petr; 1st Medical Faculty, Charles University in Prague, Anaesthesia and Intensive Care<br/> Svobodova, Eva; 1st Medical Faculty, Charles University in Prague, Anaesthesia and Intensive Care<br/> Flaksa, Marek; 1st Medical Faculty, Charles University in Prague, Anaesthesia and Intensive Care<br/> Stach, Zdenek; 1st Medical Faculty, Charles University in Prague, Anaesthesia and Intensive Care<br/> Pazout, Jaroslav; University Hospital Kralovske Vinohrady, Anaesthesia and Intensive Care<br/> Duska, Frantisek; University Hospital Kralovske Vinohrady, Anaesthesia and Intensive Care<br/> Smid, Ondrej; 1st Medical Faculty, Charles University in Prague, 2nd Dept of Medicine<br/> Stritesky, Martin; 1st Medical Faculty, Charles University in Prague, Anaesthesia and Intensive Care</p> |
| <b>Primary Subject Heading</b>: | Intensive care                                                                                                                                                                                                                                                                                                                                                                                                                                                                                                                                                                                                                                                                                                                                                                                                                                                                                                                                                                                                                                                                                                                                                                                                                                                                                                                                                                                                                                                                                                                                                                                                                                                                                                                                                                      |

1  
2  
3  
4  
5  
6  
7  
8  
9  
10  
11  
12  
13  
14  
15  
16  
17  
18  
19  
20  
21  
22  
23  
24  
25  
26  
27  
28  
29  
30  
31  
32  
33  
34  
35  
36  
37  
38  
39  
40  
41  
42  
43  
44  
45  
46  
47  
48  
49  
50  
51  
52  
53  
54  
55  
56  
57  
58  
59  
60

|                            |                                                                                                                        |
|----------------------------|------------------------------------------------------------------------------------------------------------------------|
| Secondary Subject Heading: | Cardiovascular medicine, Anaesthesia, Infectious diseases                                                              |
| Keywords:                  | Adult intensive & critical care < ANAESTHETICS, Echocardiography < CARDIOLOGY, Pacing & electrophysiology < CARDIOLOGY |
|                            |                                                                                                                        |

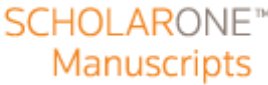

1  
2  
3  
4  
5  
6  
7  
8  
9  
10  
11  
12  
13  
14  
15  
16  
17  
18  
19  
20  
21  
22  
23  
24  
25  
26  
27  
28  
29  
30  
31  
32  
33  
34  
35  
36  
37  
38  
39  
40  
41  
42  
43  
44  
45  
46  
47  
48  
49  
50  
51  
52  
53  
54  
55  
56  
57  
58  
59  
60

1 **Efficacy and safety of 1c class antiarrhythmic agent (propafenone) for**  
2 **supraventricular arrhythmias in septic shock compared to amiodarone:**  
3 **protocol of a prospective randomized double-blind study**

4  
5 **Acronym: PRASE – Propafenone versus amiodarone in septic shock**

6  
7 Balik M<sup>1</sup>, Waldauf P<sup>2</sup>(petrwaldauf@gmail.com), Maly M<sup>1</sup>(michal.maly@vfn.cz), Matousek  
8 V<sup>1</sup>(vojtech.matousek@vfn.cz), Brozek T<sup>1</sup>(tomas.brozek@vfn.cz), Rulisek  
9 J<sup>1</sup>(jan.rulisek@vfn.cz), Porizka M<sup>1</sup>(michal.porizka@vfn.cz), Sachl R<sup>1</sup>(robert.sachl@vfn.cz),  
10 Otahal M<sup>1</sup>(michal.otahal@vfn.cz), Brestovansky P<sup>1</sup>(petr.brestovansky@vfn.cz), Svobodova  
11 E<sup>1</sup>(eva.svobodova@vfn.cz), Flaksa M<sup>1</sup>(marek.flaksa@vfn.cz), Stach Z<sup>1</sup>(zdenek.stach@vfn.cz),  
12 Pazout J<sup>2</sup>(jaroslav.pazout@gmail.com), Duska F<sup>2</sup>(fduska@yahoo.com), Smid  
13 O<sup>3</sup>(ondrej.smid@vfn.cz), Stritesky M<sup>1</sup>(martin.stritesky@vfn.cz)

14 <sup>1</sup>Department of Anesthesiology and Intensive Care, 1<sup>st</sup> Faculty of Medicine, Charles  
15 University and General University Hospital in Prague, Czechia, EU

16 <sup>2</sup>Department of Anaesthesiology and Intensive Care, 3<sup>rd</sup> Faculty of Medicine, Charles  
17 University and Kralovske Vinohrady University Hospital in Prague

18 <sup>3</sup>2<sup>nd</sup> Department of Medicine – Dept of Cardiovascular Medicine, 1<sup>st</sup> Faculty of Medicine,  
19 Charles University and General University Hospital in Prague

20 **Corresponding author:**

21 Martin Balik, M.D., Ph.D. , Department of Anesthesiology and Intensive Care, 1<sup>st</sup> Faculty of  
22 Medicine, Charles University and General University Hospital, U nemocnice 2, Prague 2, 128  
23 00, Czech Republic, tel: +420 224962244, fax: +420 224962118, e-mail: [martin.balik@vfn.cz](mailto:martin.balik@vfn.cz)

24 **Word count:**

25 Abstract: 297 words

26 Body of the text: 3979 words

27 ClinicalTrials.gov Identifier: NCT03029169

28



## Abstract

**Introduction:** Supraventricular arrhythmias contribute to haemodynamic compromise in septic shock. A retrospective study generated the hypothesis that propafenone could be more effective than amiodarone in achieving and maintaining sinus rhythm. Certain echocardiographic parameters may predict a successful cardioversion and help in the decision on rhythm or rate control strategy.

**Methods and Analysis:** The trial includes septic shock patients with new-onset arrhythmia, but without severe impairment of the left ventricular ejection fraction. After baseline echocardiography, the patient is randomized to receive a bolus and maintenance dose of either amiodarone or propafenone. The primary outcome is the proportion of patients that have achieved rhythm control at 24 hours after the start of the infusion. The secondary outcomes are the percentages of patients that needed rescue treatments (DC cardioversion or unblinding and cross over of the antiarrhythmics), the recurrence of arrhythmias, ICU mortality, 28-day and 1-year mortality. In the post-hoc analysis we separately assess subgroups of patients with pulmonary hypertension and right ventricular dysfunction. In the exploratory part of the study we assess whether the presence of a transmitral diastolic A wave and its higher velocity-time integral is predictive for the sustainability of mechanical sinus rhythm and whether the indexed left atrial endsystolic volume is predictive of recurrent arrhythmia. Considering that the restoration of sinus rhythm within 24h occurred in 74% of the amiodarone-treated patients and in 89% of the patients treated with propafenone, we plan to include 200 patients to have an 80% chance to demonstrate the superiority of propafenone at  $p=0.05$ .

**Ethics and Dissemination:** The trial is recruiting patients according to its 2<sup>nd</sup> protocol version approved by the University Hospital Ethical Board on the 6<sup>th</sup> October 2017 (No.1691/16S-IV). The results will be disseminated through peer reviewed publications and conference presentations.

**Trial registration:** ClinicalTrials.gov Identifier: NCT03029169, registered on 24.1.2017

**Key words:** supraventricular arrhythmia, septic shock, propafenone, amiodarone, intensive care

## 1 Article Summary: Strengths and limitations of this study

- 2 - Randomized controlled trial comparing propafenone versus amiodarone in septic  
3 shock patients with normal to moderately reduced EF\_LV should eliminate the bias of  
4 previous trials where patients with all levels of LV systolic function and various illness  
5 severities were compared.
- 6 - The trial should answer the issue of safety of the 1C class agent propafenone given  
7 within the summary of product characteristics in the critically ill – in contrast to the  
8 older trials on less severely ill patients.
- 9 - The outcomes of cardioverted patients with improved diastolic function will be  
10 compared to matched patients who remain in persisting arrhythmias.
- 11 - The analysis of applied complex echocardiography protocol may propose simple echo  
12 parameters which may help in the decision on rhythm versus rate control approach.
- 13 - Due to the scarcity of data in the current literature the hypotheses are based on a  
14 single large retrospective study on septic shock patients with SV arrhythmias.

## 17 Introduction

18 The incidence of supraventricular (SV) arrhythmias varies between 8-25% in the critically ill  
19 depending on the illness severity<sup>1-5</sup>. New onset SV arrhythmias are a contributor to diastolic  
20 and systolic heart failure<sup>6</sup>. Loss of atrial systole associates with two to five times increased  
21 mortality among critically ill patients<sup>1-3</sup> which is in contrast to lacking evidence that  
22 reverting back to sinus rhythm (SR) improves outcome<sup>7,8</sup>. The uncertainty whether to aim  
23 for rate control rather than for rhythm control therapy also originates from the observed  
24 recurrence of arrhythmias and the side effects of the antiarrhythmics.

25 Besides improving oxygenation, preload and electrolyte corrections, the electric  
26 cardioversion is indicated in unstable patients with no contraindications and is more feasible  
27 in combination with an antiarrhythmic agent due to high rates of an early relapse of atrial  
28 fibrillation<sup>9</sup>.

29 The data on various antiarrhythmic medications in the current literature shows some  
30 important limitations, particularly the absence of an echocardiographic protocol before  
31 deciding on treatment<sup>6</sup>. Some of the available studies lack an attempt to avoid potentially  
32 unfeasible medication in an unstable, critically ill patient. For example, a large pool (36%) of  
33 patients in sepsis was medicated with calcium channel blockers which can help with rate  
34 control at the cost of reducing ventricular contractility and promotion of vasodilatation.  
35 These side effects may impact upon haemodynamic stability in a patient with left ventricular  
36 compromise and/or septic vasoplegia<sup>10</sup>. In the studies suggesting beneficial effects of  
37 betablockers<sup>11-14</sup> haemodynamic monitoring did not include echocardiography and the  
38 comparisons to control patients were fraught with high mortality of the control group<sup>12</sup>.

1  
2  
3 1 Particularly the severe LV systolic dysfunction and conduction disorders should be excluded  
4 2 prior to beta-blocker administration in the septic shock patients <sup>13 15</sup>.

5 3 The mainstay of antiarrhythmic therapy<sup>6</sup> is represented by amiodarone which is preferred  
6 4 for its lower cardiodepressant side effect compared to other agents and electric  
7 5 cardioversion <sup>16-19</sup>. Extensive use of amiodarone contrasts with its multiorgan side effects  
8 6 and its application even in patients with normal LV systolic function <sup>20 21</sup> demonstrates poor  
9 7 compliance with current guidelines <sup>22</sup>. Hypotension may occur due to amiodarone's  
10 8 vasodilatory effects and QTc prolongation associates with the occurrence of torsades-des-  
11 9 pointes type of ventricular tachycardia. In the long term administration the adverse effects  
12 10 involve particularly thyroid function <sup>23</sup>, hepatic dysfunction<sup>24</sup>, interstitial pneumonia and  
13 11 pulmonary fibrosis<sup>25-27</sup>.

14 12 The use of 1C agents has been discouraged by studies describing poor outcome during long  
15 13 term administration in the cardiology population <sup>28</sup>. Few available case reports demonstrate  
16 14 serious adverse effects apparently related to the dose related cardiotoxicity <sup>28-30</sup>.

17 15 Consequently, 1C class agents like propafenone and flecainide <sup>31</sup>, are scarcely used in the  
18 16 critically ill. In contrast to flecainide and encainide, propafenone is derived from  
19 17 propandiolamine, which is a chemical compound of betablockers and acts on the rapid  
20 18 depolarizing phase (phase 0) and also, to a minimal extent, on beta-adrenergic receptors <sup>32-</sup>  
21 19 <sup>34</sup>. Compared to flecainide, propafenone also lacks any evidence of its relationship to  
22 20 mortality <sup>35</sup>.

23 21 Our retrospective study <sup>4 5</sup> suggests that propafenone might be feasible to restore SR  
24 22 without an adverse effect on haemodynamics and with a possible benefit on the outcome of  
25 23 the septic shock patients (Fig.1) <sup>4 5</sup>. A chance to cardiovert seemed to be significantly higher  
26 24 under propafenone than in amiodarone and was close to the cardioversion rates of the  
27 25 betablocker metoprolol. No secondary arrhythmias or conduction disorders requiring  
28 26 treatment other than adjustment of the rate of infusion were observed <sup>4 5</sup>. Another recent  
29 27 retrospective study found faster and more successful cardioversion with propafenone as  
30 28 compared to amiodarone for new onset atrial fibrillation in an emergency department. The  
31 29 safety profiles of the two agents were not different <sup>36</sup>.

32 30 The current trial is intended to prospectively verify the efficacy and safety of propafenone  
33 31 administered under echocardiography control in the critically ill with septic shock. The trial  
34 32 also challenges the concept of amiodarone applied as a relatively toxic universal  
35 33 antiarrhythmic agent with a similar short-term safety profile as propafenone, whilst being  
36 34 slower and less efficient in cardioverting a supraventricular arrhythmia in a septic shock  
37 35 patient. The authors also hypothesize that actively pursuing sinus rhythm and cardioverting  
38 36 patients may contribute to the therapy of diastolic dysfunction with a positive impact on  
39 37 mortality <sup>7</sup>.

## 38 39 **Methods/Design**

40  
41  
42  
43  
44  
45  
46  
47  
48  
49  
50  
51  
52  
53  
54  
55  
56  
57  
58  
59  
60

1  
2  
3 1 We designed a prospective double blinded randomized trial comparing propafenone to  
4 2 amiodarone administered for a SV arrhythmia in critically ill patients with septic shock.  
5  
6 3

#### 4 **Primary aims**

5 The trial should prove that propafenone is more efficient than amiodarone in cardioverting a  
6 SV arrhythmia in patients with normal to moderately reduced EF\_LV at 24h from the onset.

7 The rationale stems from the retrospective data set where the primary cardioversion rate of  
8 SV arrhythmia under propafenone was 88.9% versus 73.5% under amiodarone<sup>45</sup>. The  
9 authors also expect faster cardioversion under propafenone and lower rates of arrhythmia  
10 recurrence in the propafenone group. Despite prejudices arising particularly from the CAST  
11 trial and case reports on dose dependent toxicity, research should prove the safety of the 1C  
12 class agent propafenone given within the summary of product characteristics<sup>2931</sup>. The  
13 retrospective study<sup>45</sup> has shown that the ICU and 28-day mortalities of patients treated  
14 with propafenone were better than the parameters of the amiodarone patients. In other  
15 words, propafenone administration did not increase mortality as suggested by the older  
16 trials on non-ICU patients<sup>28-30</sup>. Moreover, patients with a supraventricular arrhythmia  
17 treated with propafenone had a significantly better adjusted 12-month survival than the  
18 critically ill treated with amiodarone (Fig.1). If proven, physicians could avoid a widespread  
19 use of amiodarone in the critically ill.

20 The cardioverted patients (rhythm control) may showcase better outcome parameters (ICU  
21 mortality, 28-day mortality, 1-year mortality) than those remaining in an acute onset  
22 arrhythmia (rate control). A rationale beyond this hypothesis is in the pilot study<sup>45</sup> which  
23 also included patients with severe LV dysfunction and associated higher rates of recurrent SV  
24 arrhythmias. Focusing on only normal to moderate LV systolic dysfunction may minimize bias  
25 associated with arrhythmia treatment of patients with severe LV systolic dysfunction.  
26 Likewise, patients with severe LV dysfunction were also included in the published trials  
27 dealing with either 1C class antiarrhythmics (e.g. CAST trial,<sup>28</sup>) or in the trials studying  
28 rhythm vs rate control (e.g. AFFIRM, RACE or AF-CHF Trial,<sup>37-40</sup>). Due to high success of  
29 rhythm control therapy (74.4% and 87% excluding chronic AF) in the retrospective study on  
30 234 patients<sup>45</sup>, the group with persisting acute onset SV arrhythmia was significantly  
31 smaller in number causing an asymmetry in statistic evaluation. This may also account for  
32 not significantly better outcome of the cardioverted versus those remaining in the SV  
33 arrhythmias (Fig.2).

#### 34 35 **Secondary aims**

36 The presence of a transmitral diastolic A wave and its higher velocity-time integral (VTI) at 4h  
37 post cardioversion would indicate a presence of mechanical sinus rhythm. A small or  
38 negligible A wave may represent only the electric sinus in the absence of its mechanical  
39 correlate. This finding could be related to the increased indexed left atrial end-systolic  
40 volume (LAVi) and to a recurrence of a SV arrhythmia<sup>4142</sup>. The LAVi in all patients and altered

1  
2  
3 1 filling pressures estimated by echocardiography could be predictive of arrhythmia  
4 2 recurrence<sup>43 44</sup>.  
5  
6 3 Propafenone could be more efficient than amiodarone in patients with pulmonary  
7 4 hypertension and RV dysfunction without left ventricular systolic dysfunction.  
8  
9 5 A left ventricular relaxation disorder and a pseudonormal LV filling are more dependent on  
10 6 the atrial kick compared to the restrictive LV filling which is often accompanied by a dilated  
11 7 poorly contracting left atrium. The classic stratification of diastolic dysfunction relates to the  
12 8 patient's prognosis in septic shock<sup>45</sup>. Hence, a complex echo assessment may contribute to  
13 9 the decision whether to aim for rhythm or for rate control only. Evaluation of the doppler  
14 10 parameters will depend on rhythm, heart rate, regularity of arrhythmia and peripheral pulse  
15 11 deficit<sup>41 43</sup>.  
16  
17  
18  
19  
20

### 21 13 **Flow chart and study setting**

22 14

23 15 Patients are randomized by the unblinded team lead by a research nurse. The planned  
24 16 number of included patients is 100 in each arm of the study with a total of 220 randomized  
25 17 patients. A dropout of 10% is anticipated. The estimated duration of the study is 4 years  
26 18 including follow up. The patients have been recruited since November 2017 in three  
27 19 university hospital ICUs. The department of Anaesthesia and Intensive Care of the General  
28 20 University Hospital has been performing for years as a teaching centre for critical care  
29 21 echocardiography and ultrasound. Together with the Coronary Care Unit of the General  
30 22 University Hospital both departments are integrated as a Complex Cardiovascular Centre.  
31 23 The department of Anaesthesia and Intensive Care of the University Hospital Vinohrady is a  
32 24 mainstay of the Complex Prague Traumacentre.  
33  
34  
35  
36  
37

### 38 26 **Inclusion Criteria**

39 27

40 28 The study targets adult patients (16-85 years) in septic shock with a new onset SV  
41 29 arrhythmia or known paroxysmal SV arrhythmia who show normal or mildly to moderately  
42 30 reduced LV systolic function according to the echocardiography examination (i.e. EF\_LV  
43 31  $\geq 35\%$ )(Fig.3). A diagnosis of septic shock is made according to the 2016 definition<sup>46</sup> as  
44 32 sepsis with a vasopressor requirement to maintain a mean arterial pressure of 65 mm Hg or  
45 33 greater. The arterial lactate level should be greater than 2 mmol/L in the absence of  
46 34 hypovolemia or low cardiac output. The highest arterial lactate level is recorded, i.e. lactate  
47 35  $< 2.0$  mmol/l at the time of randomization does not exclude a patient from the study. This  
48 36 might also be justified by the reported incidence of sepsis related cardiac dysfunction which  
49 37 is highest 72-96h after the onset of septic shock<sup>47</sup>. The presence of a suspected infection is  
50 38 for the purpose of this study defined as a positivity of at least one inflammatory marker of  
51 39 the monitored CRP and PCT and a clinical decision to administer antibiotic treatment for a  
52 40 specified infection source.  
53  
54  
55  
56  
57  
58  
59  
60

## 1 Exclusion Criteria

2  
3  
4  
5  
6  
7 The study respects all exclusion criteria for a blinded administration of propafenone or  
8 amiodarone. These are severe LV systolic dysfunction (i.e. EF<35%), a history indicating more  
9 than the 1<sup>st</sup> degree AV block and high dose vasopressor therapy represented by continuous  
10 noradrenaline administration of more than 1.0 ug/kg.min. Contraindications to  
11 randomisation are known intolerance to amiodarone or propafenone, iodine allergy and an  
12 active thyroid disease other than chronic hormone substitution for benign goiter. An  
13 interstitial pneumonia is not considered a contraindication to randomization with regards to  
14 delayed effects of amiodarone upon the lung parenchyma <sup>27</sup> and expected short period of its  
15 administration. Similarly, liver dysfunction is not a contraindication for amiodarone assuming  
16 a titrated short duration of the medication. Chronic persistent AF represents an exclusion  
17 while known chronic paroxysmal AF is not an exclusion criterion. Patients dependent on a  
18 pacemaker or after a Maze procedure are also excluded.

## 19 Interventions and research protocol

20  
21  
22  
23  
24  
25  
26  
27  
28  
29  
30  
31  
32  
33  
34  
35  
36  
37  
38  
39  
40  
41  
42  
43  
44  
45  
46  
47  
48  
49  
50  
51  
52  
53  
54  
55  
56  
57  
58  
59  
60  
Screened patients will have a haemodynamic examination provided according to the study  
protocol. With the onset of arrhythmia, the usual treatment is expected including preload  
correction, reduction of unnecessary vasopressors, ion supplementation (aiming particularly  
for K<sup>+</sup> >4.0 mM and Mg<sup>2+</sup> > 1.0 mM) and maintenance of tissue oxygen delivery.  
Echocardiography should also guide optimization of preload.  
The complex protocol is formatted in an electronic case report form (CRF). After checking up  
the inclusion and exclusion criteria the CRF allocates the patients randomly using built in  
software ([www.randomization.com](http://www.randomization.com)) into the propafenone or amiodarone arm (Fig.3).  
The patient's characteristics include the illness severity scores, source of septic shock, data  
on mechanical ventilation and homeostasis, baseline haemodynamic data, baseline  
laboratory data, patient's medications, haemodynamic data at proposed steps plus follow up  
data including outcome (Fig.4).  
Haemodynamic evaluation includes ICU standard plus echocardiography (Fig.4). The study  
team involves 8 intensivists with a European Accreditation in Echocardiography (either ESC  
or EACTA backed) and three qualified cardiologists-intensivists.  
By no means is an antiarrhythmic given out of the summary of product characteristics. Both  
arms will have standard treatment, there are no limits to electric cardioversion as part of the  
treatment which is indicated at anytime in haemodynamic compromise and in signs of low  
cardiac output or insufficient perfusion pressures due to arrhythmia.  
The propafenone arm constitutes administering a bolus of 35-70 mg of intravenous  
propafenone followed by a continuous infusion of 400-840 mg/24h in a black syringe. The  
amiodarone arm constitutes administering a bolus of 150-300 mg of intravenous  
amiodarone followed by a continuous infusion of 600-1800 mg/24h in a black syringe.

1  
2  
3 1 A 12-lead ECG is taken every 12h whilst on the antiarrhythmic infusion. Besides  
4 2 echocardiography pre-randomization the control echocardiography is performed 1h post  
5 3 cardioversion and 4h post cardioversion. Echocardiography is also performed every day until  
6 4 cardioversion, it is also mandatory in any kind of haemodynamic instability. All the Doppler  
7 5 measurements are recorded at end-expiration and 3 cardiac cycles when in sinus rhythm and  
8 6 5-10 during arrhythmia are analysed and averaged. All recordings should be acquired with an  
9 7 ECG (lead II), and ideally, at the speed of 100 mm/s.

10 8 If electrically cardioverted in addition to administered pharmacotherapy, then  
11 9 echocardiography is performed 1h post cardioversion and 4h post cardioversion.

12 10 If cardioverted later than within 24h after randomization then echocardiography is  
13 11 performed at 1h and 4h after cardioversion. The times of cardioversion and arrhythmia  
14 12 relapses are always recorded.

15 13 If a patient spontaneously cardioverts before the drug is administered, i.e. between  
16 14 randomization and drip initiation, the patient is monitored accordingly and included in the  
17 15 intention-to-treat analysis.

### 18 **Primary outcome measures**

19  
20 1. The efficacy in restoration of sinus rhythm assessed as the proportion of patients  
21 2 who are in sinus rhythm 24 hours after the beginning of the infusion of the study drug and  
22 3 remain in sinus rhythm until discharge from ICU. The primary outcome will be assessed in all  
23 4 randomised patients (i.e. intention-to-treat analysis).

24 2. A-priori defined subgroup analysis: Primary outcome will be analysed in the following  
25 3 subgroups of patients:

26 4 a) with and without indexed left atrial endsystolic volume (LAVi) higher than  $>40$  ml/m<sup>2</sup>.

27 5 b) with and without pulmonary hypertension (defined as PAPs  $>40$  mmHg) associated with  
28 6 moderate to severe RV dysfunction (dilated RV with TAPSE  $<15$  mm)

### 29 30 **Secondary outcome measures**

31  
32 1. The cumulative proportion of patients receiving rescue treatment for arrhythmia  
33 2 defined as direct current cardioversion or administration of an alternative antiarrhythmic  
34 3 drug during the first 24 hours (cross-over from one arm to the other resulting in unblinding  
35 4 of the study, e.g. from amiodarone to propafenone due to a persisting arrhythmia or from  
36 5 propafenone to amiodarone due to a decrease in LV systolic function).

37 6 2. The cumulative proportion of patients receiving rescue treatment for arrhythmia  
38 7 defined as direct current cardioversion, cross-over to the alternative study drug or another  
39 8 antiarrhythmic drug during ICU stay.

40 9 3. Mortality at discharge from ICU, at 28 days and at 1 year.

1  
2  
3 1 4. Vasopressor-free days at day 28.  
4 2  
5 3  
6 4

#### 7 **Safety issues and patient's monitoring** 8 9

10 6 Besides cardioversion monitoring, TTE is also acquired in any kind of haemodynamic  
11 7 instability (i.e. change in vasopressor support). This is important to avoid administering a  
12 8 potentially cardiodepressant propafenone in a patient developing septic cardiomyopathy. 12  
13 9 hourly 12-lead ECG for the monitoring of conduction times (PQ, QRS, QTc) is performed  
14 10 while the patient is on the antiarrhythmic infusion. In case of an AV block of the first degree  
15 11 or extension of the conduction times (QRS or QTc) the slowing or temporary ceasing of the  
16 12 medication in relation to heart rate is mandatory. Adjustment of the infusion rate or  
17 13 eventual termination of an antiarrhythmic medication does not exclude the patient from the  
18 14 study. Cessation of medication after reaching sinus rhythm equally does not exclude the  
19 15 patient. If an infusion is interrupted and re-started then the number of infusion hours are  
20 16 counted up as a sum of infusion hours.

21 17 In case of progression of septic cardiomyopathy and a decrease of contractility (decrease of  
22 18 EFLV to <35%) or a progression of mitral regurgitation with a risk of low cardiac output the  
23 19 study drug is unblinded and propafenone discontinued. Further treatment is decided by the  
24 20 clinician. If the study is unblinded due to haemodynamic instability, the second drug after  
25 21 study arm cross-over is administered without an initial bolus.

26 22 Anytime the patient becomes haemodynamically unstable or has another reason (as per  
27 23 discretion of the treating clinician) to benefit from electric cardioversion (DCC), then DCC is  
28 24 delivered without delay.

29 25 Should there be a concern at any point in time about the safety of the drug, the treating  
30 26 clinicians are encouraged to unblind the treatment drug without delay and alter the  
31 27 treatment accordingly. The course of the trial is regularly reported to the hospital Ethical  
32 28 Board which acts as the research supervising body. The minimum frequency of the report is  
33 29 once per year throughout the duration of the trial which is proposed from 2018 till 2021.  
34 30

#### 35 **Statistics and power analysis** 36 37

38 33 All analysis will be conducted in R Core Team (2019) and will be available together with the  
39 34 raw data. Exploratory data analysis will be performed for both baseline and outcome  
40 35 parameters. Continuous parameters will be described as means and standard deviations and  
41 36 as medians and the interquartile ranges if not normally distributed. Log-normally distributed  
42 37 parameters will be logarithmically transformed if needed. Binary data will be described as  
43 38 counts and frequencies. Statistical significances of differences between groups will be  
44 39 described as odds ratio, hazard ratio or mean difference according to the type of analysis  
45 40 with 95% confidence interval. Both intention-to-treat and per protocol analysis will be  
46 41 performed.  
47  
48  
49  
50  
51  
52  
53  
54  
55  
56  
57  
58  
59  
60



1  
2  
3 1 The primary outcome (proportion of patients that have achieved rhythm control at 24 hours  
4 2 after the start of the infusion) will be analysed using logistic regression and time to event  
5 3 analysis (Cox regression). The secondary outcomes (proportion of patients that needed  
6 4 rescue treatments), recurrence of arrhythmias, ICU mortality, 28-day and 1-year mortality  
7 5 will be analysed using logistic regression. If significant differences in baseline characteristics  
8 6 are found between analysed groups then multivariate regression for adjustments to these  
9 7 variables will be performed.

10 8 The required number of patients is based on the power analysis and data from the pilot  
11 9 retrospective study<sup>45</sup>. The entry parameters for sample size analysis were estimated by the  
12 10 probabilities of cardioversion of 75% for the amiodarone group and 90% for the  
13 11 propafenone group within 24h from the onset of arrhythmia, randomisation ratio 1:1,  
14 12  $p=0.05$  and power 0.8. To achieve a statistically significant difference under these conditions  
15 13 100 patients need to be included into each group, altogether 200 patients into the trial.  
16 14 Assuming 10% drop out the authors plan to randomize 220 patients.

#### 15 16 **Ethics approval and dissemination:**

17  
18 The local ethical approvals have been received from the Ethics Committee of the 1<sup>st</sup> Medical  
19 Faculty and General University Hospital (No. 1691/16 S-IV) and from the Ethics Committee of  
20 the 3<sup>rd</sup> Medical Faculty and University Hospital Kralovske Vinohrady. The written informed  
21 consent is sought from the patient's next of kin. The results will be disseminated through  
22 peer reviewed publications and conference presentations. The study repository will be  
23 created with the dataset available after study completion. The recruitment has begun  
24 through the electronic case report form on the 23<sup>rd</sup> October 2017 and is expected to be  
25 completed in December 2021.

#### 26 27 **Patient and Public Involvement**

28  
29 Patients and public are not involved in the design and conduct of the study. The results of  
30 the trial will be disseminated to the involved patients and their next of kin upon their  
31 requests, which is offered during collection of the informed consents.

#### 32 33 **Limitations and conclusions**

34  
35 The available literature on SV arrhythmias in septic shock shows critically ill patients with a  
36 high predicted mortality, IPPV rate of 99% and high rates of CRRT (27-31%)<sup>45</sup>. Up to now all  
37 the authors adhered to the septic shock criteria based on volume non-responsive SIRS with a  
38 need for a vasopressor and antibiotic therapy administered for an infectious source<sup>48</sup>.  
39 Applying the novel septic shock criteria of 2016<sup>46</sup> may increase specificity at the cost of  
40 lacking sensitivity to include even those who could potentially benefit from septic shock  
41 therapy<sup>49</sup>. If applying the results of the current trial to less severe patients, e.g. those

1 classified according to the older criteria, the SOFA score and a median arterial lactate level  
2 may serve as controls adjusting the studied population in context of the novel septic shock  
3 criteria published in 2016 <sup>46</sup>.

4 The hypothesis that propafenone might be superior to amiodarone in cardioverting newly  
5 appearing SV arrhythmia with an impact on the long term outcome may not be proved due  
6 to the confounding factors of the retrospective study <sup>45</sup>. Albeit being statistically  
7 insignificant, LV systolic function was mildly higher in the propafenone and betablocker  
8 patients compared to those on amiodarone. The severe LV systolic dysfunctions were  
9 medicated with amiodarone, the same being applied to patients on a higher dosage of  
10 noradrenaline compared to the patients with moderate to mild LV systolic dysfunction and  
11 those with a lower dosage of noradrenaline in the propafenone and betablocker groups <sup>45</sup>.  
12 The retrospective study also included patients with a cross-over from an unsuccessful  
13 antiarrhythmic therapy to another group during 24 hours as part of the rhythm control  
14 strategy. This increased the pool of the propafenone patients after administering the agent  
15 in patients who were not able to cardiovert and maintain sinus rhythm on amiodarone <sup>45</sup>.  
16 This, so far, might represent an unreported synergistic effect of the two antiarrhythmic  
17 agents on achieving a high cardioversion rate, yet with a very acceptable safety profile <sup>45</sup>.  
18 The current prospective trial allows a cross-over between the arms however, only in a  
19 haemodynamic instability and with immediate unblinding.

20 The observed median age in an adult ICU varies around 55-65 years. The age related  
21 prevalence of hypertension and ischaemic heart disease suggests a large proportion of  
22 patients with a benefit of atrial systole and thus an indication for the rhythm control  
23 approach <sup>7</sup>. The prevalence of newly occurring SV arrhythmias and the broad spectrum of  
24 potentially reversible triggers in the critically ill offer an opportunity for cardioversion in  
25 closely monitored patients rather than in ambulatory patients in cardiology. Moreover,  
26 septic shock is often fraught with diastolic dysfunction and to restore sinus rhythm might be  
27 of paramount importance for the therapy of diastolic heart failure.

28  
29  
30 **List of abbreviations:** AF atrial fibrillation, APACHE II acute physiologic and chronic health  
31 evaluation, AV atrio-ventricular, CRRT continuous renal replacement therapy, CRP C reactive  
32 protein, DCC direct current cardioversion, DO<sub>2</sub>/VO<sub>2</sub> oxygen delivery/oxygen consumption,  
33 EF ejection fraction, EF\_LV ejection fraction of left ventricle, ICU intensive care unit, K<sup>+</sup>  
34 plasmatic potassium, LA left atrium, LAVi indexed end-systolic left atrial volume, LV left  
35 ventricle/ left ventricular, LVOT left ventricular outflow tract, Mg<sup>2+</sup> plasmatic magnesium,  
36 PAPs pulmonary artery systolic pressure, PCT procalcitonin, PRCT prospective controlled  
37 randomized trial, RV right ventricle, SIRS systemic inflammatory response syndrome, SOFA  
38 sequential organ function assessment, SR sinus rhythm, SV supraventricular, TAPSE tricuspid  
39 annular plane excursion, TTE transthoracic echocardiography, VTI velocity-time integral

1  
2  
3 **1 Author Contributions**  
4

5 2 MB – study coordinator, concept and design, drafting, revisions and approval of articles,  
6 3 provision of funding. PW, FD – concept and design, electronic case report form, statistics,  
7 4 article revisions, data collection. MP, JR, MO, VM, MM, TB, RS, JP, PB, ES, MF, ZS, MS – data  
8 5 collection, article revisions. OS – article revisions, data collection, unblinded team  
9 6 coordination.  
10 7  
11 8

12  
13  
14  
15 **9 Funding**  
16

17 10  
18 11 The protocol has received a four year (2018-2022) grant support from the Czech Health  
19 12 Research Council, AZV No. NV18-06-00417, commencing on the 1<sup>st</sup> of May 2018.  
20 13  
21

22 14  
23 15  
24 16 **Competing interests:** None  
25 17  
26 18  
27 19  
28  
29  
30  
31  
32  
33  
34  
35  
36  
37  
38  
39  
40  
41  
42  
43  
44  
45  
46  
47  
48  
49  
50  
51  
52  
53  
54  
55  
56  
57  
58  
59  
60

## 1 References

1. Arrigo M, Bettex D, Rudiger A. Management of atrial fibrillation in critically ill patients. *Critical care research and practice* 2014;2014:840615. doi: 10.1155/2014/840615 [published Online First: 2014/02/15]
2. Kuipers S KKP, Cremer OL. Incidence, risk factors and outcomes of new-onset atrial fibrillation in patients with sepsis: a systematic review. *Crit Care* 2014;18(6):688.
3. Klein Klouwenberg PM FJ, Kuipers S, Ong DS, Peelen LM, van Vught LA, Schultz MJ, van der Poll T, Bonten MJ, Cremer OL; MARS consortium. Incidence, Predictors and Outcomes of New-onset Atrial Fibrillation in Critically Ill Patients with Sepsis: a Cohort Study. *Am J Respir Crit Care Med* 2016 doi: 10.1164/rccm.201603-0618OC [published Online First: 28 Jul 2016]
4. Balik M, Kolnikova I, Maly M, et al. Propafenone for supraventricular arrhythmias in septic shock- Comparison to amiodarone and metoprolol. *Journal of critical care* 2017;41:16-23. doi: 10.1016/j.jcrc.2017.04.027 [published Online First: 2017/05/04]
5. Balik M, Maly M, Brozek T, et al. Propafenone for supraventricular arrhythmias in septic shock – Comparison to amiodarone and metoprolol. The author's reply. *Journal of critical care* 2018;45:247-48. doi: 10.1016/j.jcrc.2018.01.024 [published Online First: 2018/02/06]
6. Balik M, Matousek V, Maly M, et al. Management of arrhythmia in sepsis and septic shock. *Anaesthesiology intensive therapy* 2017;49(5):419-29. doi: 10.5603/AIT.a2017.0061 [published Online First: 2017/11/19]
7. Balik M. New-onset atrial fibrillation in critically ill patients - Implications for rhythm rather than rate control therapy? *International journal of cardiology* 2018;266:147-48. doi: 10.1016/j.ijcard.2018.04.078 [published Online First: 2018/06/12]
8. Liu WC, Lin WY, Lin CS, et al. Prognostic impact of restored sinus rhythm in patients with sepsis and new-onset atrial fibrillation. *Crit Care* 2016;20(1):373. doi: 10.1186/s13054-016-1548-2 [published Online First: 2016/11/20]
9. Arrigo M, Jaeger N, Seifert B, et al. Disappointing Success of Electrical Cardioversion for New-Onset Atrial Fibrillation in Cardiosurgical ICU Patients. *Critical care medicine* 2015;43(11):2354-9. doi: 10.1097/ccm.0000000000001257 [published Online First: 2015/10/16]
10. Walkey AJ, Evans SR, Winter MR, et al. Practice Patterns and Outcomes of Treatments for Atrial Fibrillation During Sepsis: A Propensity-Matched Cohort Study. *Chest* 2016;149(1):74-83. doi: 10.1378/chest.15-0959 [published Online First: 2015/08/14]
11. Morelli A DA, Ertmer C, Rehberg S, Kampmeier T, Orecchioni A, D'Egidio A, Cecchini V, Landoni G, Pietropaoli P, Westphal M, Venditti M, Mebazaa A, Singer M. Microvascular effects of heart rate control with esmolol in patients with septic shock: a pilot study. *Crit Care Med* 2013;41(9):2162-68.
12. Morelli A EC, Westphal M, Rehberg S, Kampmeier T, Ligges S, Orecchioni A, D'Egidio A, D'Ippoliti F, Raffone C, Venditti M, Guarracino F, Girardis M, Tritapepe L, Pietropaoli P, Mebazaa A, Singer M. Effect of heart rate control with esmolol on hemodynamic and clinical outcomes in patients with septic shock: a randomized clinical trial. *JAMA* 2013;310(16):1683-91.
13. Balik M RJ, Leden P, Zakharchenko M, Otahal M, Bartakova H, Korinek J. Concomitant use of beta-1 adrenoceptor blocker and norepinephrine in patients with septic shock. *Wien Klin Wochenschr* 2012;124:552-56.
14. Balik M RJ, Leden P, Zakharchenko M, Otahal M, Bartakova H, Korinek J. Concomitant use of beta-1 adrenoceptor blocker and norepinephrine in patients with septic shock. Reply to a letter to the authors. *Wien Klin Wochenschr* 2014;126(7-8):246-47.
15. McLean AS TF, Vieillard-Baron A. Beta-blockers in septic shock to optimize hemodynamics? No. *Intensive Care Med* 2016 doi: DOI 10.1007/s00134-016-4407-3 [published Online First: 27.6.2016]
16. Arrigo M BD, Rudiger A. Management of atrial fibrillation in critically ill patients. *Crit Care Res Pract* 2014;2014(840615) doi: doi: 10.1155/2014/840615

- 1 17. Kirchhof P AB, Darius H, De Caterina R, Le Heuzey JY, Schilling RJ, Schmitt J, Zamorano JL.  
2 Management of atrial fibrillation in seven European countries after the publication of the  
3 2010 ESC Guidelines on atrial fibrillation: primary results of the PREvention of  
4 thromboemolic events--European Registry in Atrial Fibrillation (PREFER in AF). *Europace*  
5 2014;16(1):6-14.
- 6 18. Sleeswijk ME VNT, Tulleken JE, Ligtenberg JJ, Girbes AR, Zijlstra JG. Clinical review: treatment of  
7 new-onset atrial fibrillation in medical intensive care patients - a clinical framework. *Crit Care*  
8 2007;11(6):233.
- 9 19. Arrigo M JN, Seifert B, Spahn DR, Bettex D, Rudiger A. Disappointing Success of Electrical  
10 Cardioversion for New-Onset Atrial Fibrillation in Cardiosurgical ICU Patients. *Crit Care Med*  
11 2015;43(11):2354-59.
- 12 20. Allen LaPointe NM, Dai D, Thomas L, et al. Antiarrhythmic drug use in patients <65 years with  
13 atrial fibrillation and without structural heart disease. *The American journal of cardiology*  
14 2015;115(3):316-22. doi: 10.1016/j.amjcard.2014.11.005 [published Online First:  
15 2014/12/11]
- 16 21. Gwag HB, Chun KJ, Hwang JK, et al. Which antiarrhythmic drug to choose after electrical  
17 cardioversion: A study on non-valvular atrial fibrillation patients. *PLoS one*  
18 2018;13(5):e0197352. doi: 10.1371/journal.pone.0197352 [published Online First:  
19 2018/05/23]
- 20 22. Kirchhof P, Benussi S, Kotecha D, et al. 2016 ESC Guidelines for the management of atrial  
21 fibrillation developed in collaboration with EACTS. *European heart journal* 2016;37(38):2893-  
22 962. doi: 10.1093/eurheartj/ehw210 [published Online First: 2016/08/28]
- 23 23. Hofmann A NC, Ofluoglu S, Holzmannhofer J, Strohmmer B, Pirich C. Incidence and predictability of  
24 amiodarone-induced thyrotoxicosis and hypothyroidism. *Wien Klin Wochenschr* 2008;120(15-  
25 16):493-98.
- 26 24. Ratz Bravo AE, Drewe J, Schlienger RG, et al. Hepatotoxicity during rapid intravenous loading with  
27 amiodarone: Description of three cases and review of the literature. *Critical care medicine*  
28 2005;33(1):128-34; discussion 245-6. [published Online First: 2005/01/13]
- 29 25. Singh VK, Maheshwari V. Acute Respiratory Distress Syndrome Complicated by Amiodarone  
30 Induced Pulmonary Fibrosis: Don't Let Your Guard Down. *Journal of clinical and diagnostic*  
31 *research : JCDR* 2017;11(4):Ud01-ud02. doi: 10.7860/jcdr/2017/24710.9674 [published  
32 Online First: 2017/06/03]
- 33 26. Hughes M, Binning A. Intravenous amiodarone in intensive care. Time for a reappraisal? *Intensive*  
34 *care medicine* 2000;26(12):1730-9. [published Online First: 2001/03/29]
- 35 27. Papiris SA, Triantafillidou C, Kolilekas L, et al. Amiodarone: review of pulmonary effects and  
36 toxicity. *Drug safety* 2010;33(7):539-58. doi: 10.2165/11532320-000000000-00000  
37 [published Online First: 2010/06/18]
- 38 28. Echt DS LP, Mitchell LB, Peters RW, Obias-Manno D, Barker AH, Arensberg D, Baker A, Friedman L,  
39 Greene HL, et al. Mortality and morbidity in patients receiving encainide, flecainide, or  
40 placebo. The Cardiac Arrhythmia Suppression Trial. *NEJM* 1991;324(12):781-88.
- 41 29. Chevalier P D-DA, Burri H, Cucherat M, Kirkorian G, Touboul P. Amiodarone versus placebo and  
42 class Ic drugs for cardioversion of recent-onset atrial fibrillation: a meta-analysis. *Journal of*  
43 *the American College of Cardiology* 2003;41(2):255-62.
- 44 30. Courand PY SF, Ranc S, Mullier A, Kirkorian G, Bonnefoy E. Arrhythmogenic effect of flecainide  
45 toxicity. *Cardiology Journal* 2013;20(2):203-05.
- 46 31. Aliot E CA, Crijns HJ, Goette A, Tamargo J. Twenty-five years in the making: flecainide is safe and  
47 effective for the management of atrial fibrillation. *Europace* 2011;13(2):161-73.
- 48 32. Varon J, Marik PE. Irwin and Rippe's intensive care medicine. In: Irwin RS, Rippe JM, eds. 6th ed.  
49 Philadelphia: Wolters Kluwer Health/Lippincott Williams & Wilkins 2008:1855-69.
- 50 33. Ganetsky M BE. Antiarrhythmic agents. In: Irwin RS RJ, ed. Intensive care medicine. 6th ed.  
51 Philadelphia: Wolters Kluwer/Lippincott, Williams&Wilkins 2008:1486-98.

- 1  
2  
3 1 34. Stoschitzky K, Stoschitzky G, Lercher P, et al. Propafenone shows class Ic and class II  
4 2 antiarrhythmic effects. *Europace* 2016;18(4):568-71. doi: 10.1093/europace/euv195  
5 3 [published Online First: 2015/06/10]  
6 4  
7 4 35. Lafuente-Lafuente C, Valembos L, Bergmann JF, et al. Antiarrhythmics for maintaining sinus  
8 5 rhythm after cardioversion of atrial fibrillation. *The Cochrane database of systematic reviews*  
9 6 2015(3):Cd005049. doi: 10.1002/14651858.CD005049.pub4 [published Online First:  
10 7 2015/03/31]  
11 8  
12 8 36. Bonora A, Turcato G, Franchi E, et al. Efficacy and safety in pharmacological cardioversion of  
13 9 recent-onset atrial fibrillation: a propensity score matching to compare amiodarone vs class  
14 10 IC antiarrhythmic drugs. *Internal and emergency medicine* 2017;12(6):853-59. doi:  
15 11 10.1007/s11739-016-1497-4 [published Online First: 2016/07/08]  
16 12  
17 12 37. Van Gelder IC, Hagens VE, Bosker HA, et al. A comparison of rate control and rhythm control in  
18 13 patients with recurrent persistent atrial fibrillation. *The New England journal of medicine*  
19 14 2002;347(23):1834-40. doi: 10.1056/NEJMoa021375 [published Online First: 2002/12/06]  
20 15  
21 15 38. Wyse DG, Waldo AL, DiMarco JP, et al. A comparison of rate control and rhythm control in  
22 16 patients with atrial fibrillation. *The New England journal of medicine* 2002;347(23):1825-33.  
23 17 doi: 10.1056/NEJMoa021328 [published Online First: 2002/12/06]  
24 18  
25 18 39. ARISE Investigators; ANZICS Clinical Trials Group PS, Delaney A, Bailey M, Bellomo R, Cameron PA,  
26 19 Cooper DJ, Higgins AM, Holdgate A, Howe BD, Webb SA, Williams P. Goal-directed  
27 20 resuscitation for patients with early septic shock. *NEJM* 2014;371(16):1496-506.  
28 21  
29 21 40. Gillinov AM, Bagiella E, Moskowitz AJ, et al. Rate Control versus Rhythm Control for Atrial  
30 22 Fibrillation after Cardiac Surgery. *The New England journal of medicine* 2016;374(20):1911-  
31 23 21. doi: 10.1056/NEJMoa1602002 [published Online First: 2016/04/05]  
32 24  
33 24 41. Chung CS, Kovacs SJ. Consequences of increasing heart rate on deceleration time, the velocity-  
34 25 time integral, and E/A. *The American journal of cardiology* 2006;97(1):130-6. doi:  
35 26 10.1016/j.amjcard.2005.07.116 [published Online First: 2005/12/27]  
36 27  
37 27 42. Fornengo C AM, Frea S, Gallo C, Grosso Marra W, Morello M, Gaita F. Prediction of atrial  
38 28 fibrillation recurrence after cardioversion in patients with left-atrial dilation. *Eur Heart J*  
39 29 *Cardiovasc Imaging* 2015;16(3):335-41.  
40 30  
41 30 43. Nagueh SF AC, Gillebert TC, Marino PN, Oh JK, Smiseth OA, Waggoner AD, Flachskampf FA,  
42 31 Pellikka PA, Evangelisa A. Recommendations for the evaluation of left ventricular diastolic  
43 32 function by echocardiography. *European journal of echocardiography : the journal of the*  
44 33 *Working Group on Echocardiography of the European Society of Cardiology* 2009;10(2):165-  
45 34 93.  
46 35  
47 35 44. Marchese P, Bursi F, Delle Donne G, et al. Indexed left atrial volume predicts the recurrence of  
48 36 non-valvular atrial fibrillation after successful cardioversion. *European journal of*  
49 37 *echocardiography : the journal of the Working Group on Echocardiography of the European*  
50 38 *Society of Cardiology* 2011;12(3):214-21. doi: 10.1093/ejechocard/jeq176 [published Online  
51 39 First: 2010/12/15]  
52 40  
53 40 45. Poelaert J, Declerck C, Vogelaers D, et al. Left ventricular systolic and diastolic function in septic  
54 41 shock. *Intensive care medicine* 1997;23(5):553-60. [published Online First: 1997/05/01]  
55 42  
56 42 46. Singer M DC, Seymour CW, Shankar-Hari M, Annane D, Bauer M, Bellomo R, Bernard GR, Chiche  
57 43 JD, Coopersmith CM, Hotchkiss RS, Levy MM, Marshall JC, Martin GS, Opal SM, Rubenfeld  
58 44 GD, van der Poll T, Vincent JL, Angus DC. The Third International Consensus Definitions for  
59 45 Sepsis and Septic Shock (Sepsis-3). *JAMA* 2016;315(8):801-10.  
60 46  
47 47 47. Repesse X, Charron C, Vieillard-Baron A. Evaluation of left ventricular systolic function revisited in  
48 48 septic shock. *Crit Care* 2013;17(4):164. doi: 10.1186/cc12755 [published Online First:  
49 49 2013/07/06]  
50 50  
51 49 48. Levy MM, Fink MP, Marshall JC, et al. 2001 SCCM/ESICM/ACCP/ATS/SIS International Sepsis  
52 50 Definitions Conference. *Crit Care Med* 2003;31(4):1250-6.

1  
2  
3  
4  
5  
6  
7  
8  
9  
10  
11  
12  
13  
14  
15  
16  
17  
18  
19  
20  
21  
22  
23  
24  
25  
26  
27  
28  
29  
30  
31  
32  
33  
34  
35  
36  
37  
38  
39  
40  
41  
42  
43  
44  
45  
46  
47  
48  
49  
50  
51  
52  
53  
54  
55  
56  
57  
58  
59  
60

1 49. Sterling SA, Puskarich MA, Glass AF, et al. The Impact of the Sepsis-3 Septic Shock Definition on  
2 Previously Defined Septic Shock Patients. *Critical care medicine* 2017;45(9):1436-42. doi:  
3 10.1097/ccm.0000000000002512 [published Online First: 2017/05/26]

4  
5

For peer review only

1  
2  
3 1  
4  
5 2  
6  
7 3 **Legends to figures**  
8  
9 4

10 5 **Fig.1:** Univariate analysis showing long term survival of the propafenon patients similar to  
11 6 the metoprolol group and higher than in the amiodarone medicated patients in septic shock  
12 7 (HR1.76(1.06; 2.3),p=0.024). Copied from the author's pilot retrospective study <sup>4</sup>  
13 8  
14 8

15 9  
16 9 **Fig.2:** Multivariate analysis showing insignificant 12-month benefit in cardioverting septic  
17 10 shock patients to sinus rhythm (HR0.67,p=0.113). Copied from the author's pilot  
18 11 retrospective study <sup>4</sup>  
19 12  
20 12

21 13  
22 13 **Fig.3:** Flowchart of the study  
23 14  
24 14

25 15  
26 15 **Fig.4:** SPIRIT table for the schedule of enrolment, interventions, and assessments  
27 16  
28 16  
29 17  
30 17  
31 18  
32 18  
33 19  
34 19  
35 20  
36 20  
37  
38  
39  
40  
41  
42  
43  
44  
45  
46  
47  
48  
49  
50  
51  
52  
53  
54  
55  
56  
57  
58  
59  
60



## Kaplan-Meier survival estimates



For peer review only - <http://bmjopen.bmj.com/site/about/guidelines.xhtml>

— Amiodarone    ..... Metoprolol    --- Propafenon



For peer review only - <http://bmjopen.bmj.com/site/about/guidelines.xhtml>

— Persisting arrhythmia      - - - Cardioversion

**Acronym: PRASE – Propafenone versus amiodarone in septic shock**

SV arrhythmia: AF, flutter, SVT...

- 1.) Sepsis and administration of noradrenaline due to hypotension non-responsive to correction of preload
- 2.) Elevation of arterial lactate >2.0 mmol/l during the course of disease, i.e. may be present before or during arrhythmia
- 3.) Positivity of at least one of the CRP or PCT
- 4.) Administration of antibiotics for an infectious source

Echocardiography: LV systolic function must be normal or mildly to moderately reduced

**Exclusion Criteria:**

- Severe LV systolic dysfunction
- More than 1st degree AV block
- High dose vasopressor therapy with continuous noradrenaline > 1.0 ug/kg.min
- Known intolerance to amiodarone or propafenone (incl. active thyroid disease other than chronic hormone substitution)
- Absence of septic shock
- Chronic AF - known chronic paroxysmal AF is not an exclusion criterion.
- Dependence on pacemaker
- Status after MAZE procedure
- Iodine allergy

**Randomisation**

For peer review only - <http://bmjopen.bmj.com/site/about/guidelines.xhtml>  
**Propafenone arm**

**Amiodarone arm**

|                                      | Screening | Randomisation through electronic CRF | STUDY PERIOD |             |            |             |                 |             |
|--------------------------------------|-----------|--------------------------------------|--------------|-------------|------------|-------------|-----------------|-------------|
|                                      |           |                                      | Visits       |             |            | ICU outcome | 28-days outcome | 12m-outcome |
| TIMEPOINT                            | $-T_1$    | 0                                    | $T_{+1h}^*$  | $T_{+4h}^*$ | $T_x^{**}$ |             |                 |             |
| Septic shock criteria JAMA 3/2016    | X         |                                      |              |             |            |             |                 |             |
| Informed consent                     | X         |                                      |              |             |            |             |                 |             |
| Allocation                           |           | X                                    |              |             |            |             |                 |             |
| 12-lead ECG                          | X         |                                      | X            | X           | X          |             |                 |             |
| Transthoracic echocardiography (TTE) | X         |                                      | X            | X           | X          |             |                 |             |
| Hemodynamic assessment               | X         |                                      | X            | X           | X          | X***        | X***            | X***        |
| Laboratory data                      | X         |                                      |              |             |            |             |                 |             |
| Concomitant medications              | X         |                                      |              |             |            |             |                 |             |
| <b>INTERVENTIONS:</b>                |           |                                      |              |             |            |             |                 |             |
| Propafenone bolus                    |           | X                                    |              |             |            |             |                 |             |
| Propafenone cont. infusion           |           |                                      | X            | X           | X          |             |                 |             |
| Amiodarone bolus                     |           | X                                    |              |             |            |             |                 |             |
| Amiodarone cont. infusion            |           |                                      | X            | X           | X          |             |                 |             |

\*Visits: 12-lead ECG every 12h on infusion, TTE per 24h of arrhythmia and +1h after cardioversion, +4h after cardioversion, TTE in any instability

\*\*  $T_x$  – day on antiarrhythmic infusion

\*\*\* Alive/dead, sinus/persistent arrhythmia



STANDARD PROTOCOL ITEMS: RECOMMENDATIONS FOR INTERVENTIONAL TRIALS

SPIRIT 2013 Checklist: Recommended items to address in a clinical trial protocol and related documents\*

| Section/item                      | Item No | Description                                                                                                                                                                                                                                                                              | Addressed on page number |
|-----------------------------------|---------|------------------------------------------------------------------------------------------------------------------------------------------------------------------------------------------------------------------------------------------------------------------------------------------|--------------------------|
| <b>Administrative information</b> |         |                                                                                                                                                                                                                                                                                          |                          |
| Title                             | 1       | Descriptive title identifying the study design, population, interventions, and, if applicable, trial acronym                                                                                                                                                                             | ___1___                  |
| Trial registration                | 2a      | Trial identifier and registry name. If not yet registered, name of intended registry                                                                                                                                                                                                     | ___1___                  |
|                                   | 2b      | All items from the World Health Organization Trial Registration Data Set                                                                                                                                                                                                                 | ___1, 2, 10_             |
| Protocol version                  | 3       | Date and version identifier                                                                                                                                                                                                                                                              | ___2___                  |
| Funding                           | 4       | Sources and types of financial, material, and other support                                                                                                                                                                                                                              | ___11,12___              |
| Roles and responsibilities        | 5a      | Names, affiliations, and roles of protocol contributors                                                                                                                                                                                                                                  | ___1, 11___              |
|                                   | 5b      | Name and contact information for the trial sponsor                                                                                                                                                                                                                                       | ___12___                 |
|                                   | 5c      | Role of study sponsor and funders, if any, in study design; collection, management, analysis, and interpretation of data; writing of the report; and the decision to submit the report for publication, including whether they will have ultimate authority over any of these activities | ___12___                 |
|                                   | 5d      | Composition, roles, and responsibilities of the coordinating centre, steering committee, endpoint adjudication committee, data management team, and other individuals or groups overseeing the trial, if applicable (see Item 21a for data monitoring committee)                         | ___2,10___               |

1 **Introduction**

2

3 Background and rationale 6a Description of research question and justification for undertaking the trial, including summary of relevant studies (published and unpublished) examining benefits and harms for each intervention \_\_\_ 3,4,5 \_\_\_

4

5

6 6b Explanation for choice of comparators \_\_\_ 3,4,5 \_\_\_

7

8 Objectives 7 Specific objectives or hypotheses \_\_\_ 5, 6 \_\_\_

9

10 Trial design 8 Description of trial design including type of trial (eg, parallel group, crossover, factorial, single group), allocation ratio, and framework (eg, superiority, equivalence, noninferiority, exploratory) \_\_\_ 5, 6 \_\_\_

11

12

13

14 **Methods: Participants, interventions, and outcomes**

15

16 Study setting 9 Description of study settings (eg, community clinic, academic hospital) and list of countries where data will be collected. Reference to where list of study sites can be obtained \_\_\_ 6 \_\_\_

17

18

19 Eligibility criteria 10 Inclusion and exclusion criteria for participants. If applicable, eligibility criteria for study centres and individuals who will perform the interventions (eg, surgeons, psychotherapists) \_\_\_ 6, 7 \_\_\_

20

21

22 Interventions 11a Interventions for each group with sufficient detail to allow replication, including how and when they will be administered \_\_\_ 7, 8, 9 \_\_\_

23

24

25 11b Criteria for discontinuing or modifying allocated interventions for a given trial participant (eg, drug dose change in response to harms, participant request, or improving/worsening disease) \_\_\_ 7, 8, 9 \_\_\_

26

27

28 11c Strategies to improve adherence to intervention protocols, and any procedures for monitoring adherence (eg, drug tablet return, laboratory tests) \_\_\_ 7, 8, 9 \_\_\_

29

30

31 11d Relevant concomitant care and interventions that are permitted or prohibited during the trial \_\_\_ 7, 8, 9 \_\_\_

32

33

34 Outcomes 12 Primary, secondary, and other outcomes, including the specific measurement variable (eg, systolic blood pressure), analysis metric (eg, change from baseline, final value, time to event), method of aggregation (eg, median, proportion), and time point for each outcome. Explanation of the clinical relevance of chosen efficacy and harm outcomes is strongly recommended \_\_\_ 8, 9 \_\_\_

35

36

37

38

39

40 Participant timeline 13 Time schedule of enrolment, interventions (including any run-ins and washouts), assessments, and visits for participants. A schematic diagram is highly recommended (see Figure) \_\_\_ 7, 8, Fig.3, Fig.4 \_\_\_

41

42

43

44

45

46

|    |                                                                     |     |                                                                                                                                                                                                                                                                                                                                                                                                              |                |
|----|---------------------------------------------------------------------|-----|--------------------------------------------------------------------------------------------------------------------------------------------------------------------------------------------------------------------------------------------------------------------------------------------------------------------------------------------------------------------------------------------------------------|----------------|
| 1  | Sample size                                                         | 14  | Estimated number of participants needed to achieve study objectives and how it was determined, including clinical and statistical assumptions supporting any sample size calculations                                                                                                                                                                                                                        | ___2, 9, 10___ |
| 2  |                                                                     |     |                                                                                                                                                                                                                                                                                                                                                                                                              |                |
| 3  |                                                                     |     |                                                                                                                                                                                                                                                                                                                                                                                                              |                |
| 4  | Recruitment                                                         | 15  | Strategies for achieving adequate participant enrolment to reach target sample size                                                                                                                                                                                                                                                                                                                          | ___5,6,7,8___  |
| 5  |                                                                     |     |                                                                                                                                                                                                                                                                                                                                                                                                              |                |
| 6  |                                                                     |     |                                                                                                                                                                                                                                                                                                                                                                                                              |                |
| 7  | <b>Methods: Assignment of interventions (for controlled trials)</b> |     |                                                                                                                                                                                                                                                                                                                                                                                                              |                |
| 8  | Allocation:                                                         |     |                                                                                                                                                                                                                                                                                                                                                                                                              |                |
| 9  |                                                                     |     |                                                                                                                                                                                                                                                                                                                                                                                                              |                |
| 10 | Sequence                                                            | 16a | Method of generating the allocation sequence (eg, computer-generated random numbers), and list of any factors for stratification. To reduce predictability of a random sequence, details of any planned restriction (eg, blocking) should be provided in a separate document that is unavailable to those who enrol participants or assign interventions                                                     | ___7, 8, 9___  |
| 11 | generation                                                          |     |                                                                                                                                                                                                                                                                                                                                                                                                              |                |
| 12 |                                                                     |     |                                                                                                                                                                                                                                                                                                                                                                                                              |                |
| 13 |                                                                     |     |                                                                                                                                                                                                                                                                                                                                                                                                              |                |
| 14 |                                                                     |     |                                                                                                                                                                                                                                                                                                                                                                                                              |                |
| 15 |                                                                     |     |                                                                                                                                                                                                                                                                                                                                                                                                              |                |
| 16 | Allocation                                                          | 16b | Mechanism of implementing the allocation sequence (eg, central telephone; sequentially numbered, opaque, sealed envelopes), describing any steps to conceal the sequence until interventions are assigned                                                                                                                                                                                                    | ___7, 8, 9___  |
| 17 | concealment                                                         |     |                                                                                                                                                                                                                                                                                                                                                                                                              |                |
| 18 | mechanism                                                           |     |                                                                                                                                                                                                                                                                                                                                                                                                              |                |
| 19 |                                                                     |     |                                                                                                                                                                                                                                                                                                                                                                                                              |                |
| 20 | Implementation                                                      | 16c | Who will generate the allocation sequence, who will enrol participants, and who will assign participants to interventions                                                                                                                                                                                                                                                                                    | ___7, 8, 9___  |
| 21 |                                                                     |     |                                                                                                                                                                                                                                                                                                                                                                                                              |                |
| 22 |                                                                     |     |                                                                                                                                                                                                                                                                                                                                                                                                              |                |
| 23 |                                                                     |     |                                                                                                                                                                                                                                                                                                                                                                                                              |                |
| 24 | Blinding (masking)                                                  | 17a | Who will be blinded after assignment to interventions (eg, trial participants, care providers, outcome assessors, data analysts), and how                                                                                                                                                                                                                                                                    | ___7, 8, 9___  |
| 25 |                                                                     |     |                                                                                                                                                                                                                                                                                                                                                                                                              |                |
| 26 |                                                                     |     |                                                                                                                                                                                                                                                                                                                                                                                                              |                |
| 27 |                                                                     | 17b | If blinded, circumstances under which unblinding is permissible, and procedure for revealing a participant's allocated intervention during the trial                                                                                                                                                                                                                                                         | ___7, 8, 9___  |
| 28 |                                                                     |     |                                                                                                                                                                                                                                                                                                                                                                                                              |                |
| 29 |                                                                     |     |                                                                                                                                                                                                                                                                                                                                                                                                              |                |
| 30 |                                                                     |     |                                                                                                                                                                                                                                                                                                                                                                                                              |                |
| 31 | <b>Methods: Data collection, management, and analysis</b>           |     |                                                                                                                                                                                                                                                                                                                                                                                                              |                |
| 32 |                                                                     |     |                                                                                                                                                                                                                                                                                                                                                                                                              |                |
| 33 | Data collection                                                     | 18a | Plans for assessment and collection of outcome, baseline, and other trial data, including any related processes to promote data quality (eg, duplicate measurements, training of assessors) and a description of study instruments (eg, questionnaires, laboratory tests) along with their reliability and validity, if known. Reference to where data collection forms can be found, if not in the protocol | ___8, 9, 12___ |
| 34 | methods                                                             |     |                                                                                                                                                                                                                                                                                                                                                                                                              |                |
| 35 |                                                                     |     |                                                                                                                                                                                                                                                                                                                                                                                                              |                |
| 36 |                                                                     |     |                                                                                                                                                                                                                                                                                                                                                                                                              |                |
| 37 |                                                                     |     |                                                                                                                                                                                                                                                                                                                                                                                                              |                |
| 38 |                                                                     |     |                                                                                                                                                                                                                                                                                                                                                                                                              |                |
| 39 |                                                                     | 18b | Plans to promote participant retention and complete follow-up, including list of any outcome data to be collected for participants who discontinue or deviate from intervention protocols                                                                                                                                                                                                                    | ___8, 9___     |
| 40 |                                                                     |     |                                                                                                                                                                                                                                                                                                                                                                                                              |                |
| 41 |                                                                     |     |                                                                                                                                                                                                                                                                                                                                                                                                              |                |
| 42 |                                                                     |     |                                                                                                                                                                                                                                                                                                                                                                                                              |                |
| 43 |                                                                     |     |                                                                                                                                                                                                                                                                                                                                                                                                              |                |
| 44 |                                                                     |     |                                                                                                                                                                                                                                                                                                                                                                                                              |                |
| 45 |                                                                     |     |                                                                                                                                                                                                                                                                                                                                                                                                              |                |
| 46 |                                                                     |     |                                                                                                                                                                                                                                                                                                                                                                                                              |                |

|    |                                 |     |                                                                                                                                                                                                                                                                                                                                       |                     |
|----|---------------------------------|-----|---------------------------------------------------------------------------------------------------------------------------------------------------------------------------------------------------------------------------------------------------------------------------------------------------------------------------------------|---------------------|
| 1  | Data management                 | 19  | Plans for data entry, coding, security, and storage, including any related processes to promote data quality (eg, double data entry; range checks for data values). Reference to where details of data management procedures can be found, if not in the protocol                                                                     | ___7,8,9,10_        |
| 2  |                                 |     |                                                                                                                                                                                                                                                                                                                                       |                     |
| 3  |                                 |     |                                                                                                                                                                                                                                                                                                                                       |                     |
| 4  |                                 |     |                                                                                                                                                                                                                                                                                                                                       |                     |
| 5  | Statistical methods             | 20a | Statistical methods for analysing primary and secondary outcomes. Reference to where other details of the statistical analysis plan can be found, if not in the protocol                                                                                                                                                              | ___9,10___          |
| 6  |                                 |     |                                                                                                                                                                                                                                                                                                                                       |                     |
| 7  |                                 |     |                                                                                                                                                                                                                                                                                                                                       |                     |
| 8  |                                 | 20b | Methods for any additional analyses (eg, subgroup and adjusted analyses)                                                                                                                                                                                                                                                              | ___5, 6, 7, 8, 9, _ |
| 9  |                                 |     |                                                                                                                                                                                                                                                                                                                                       |                     |
| 10 |                                 | 20c | Definition of analysis population relating to protocol non-adherence (eg, as randomised analysis), and any statistical methods to handle missing data (eg, multiple imputation)                                                                                                                                                       | ___9,10___          |
| 11 |                                 |     |                                                                                                                                                                                                                                                                                                                                       |                     |
| 12 |                                 |     |                                                                                                                                                                                                                                                                                                                                       |                     |
| 13 |                                 |     |                                                                                                                                                                                                                                                                                                                                       |                     |
| 14 | <b>Methods: Monitoring</b>      |     |                                                                                                                                                                                                                                                                                                                                       |                     |
| 15 |                                 |     |                                                                                                                                                                                                                                                                                                                                       |                     |
| 16 | Data monitoring                 | 21a | Composition of data monitoring committee (DMC); summary of its role and reporting structure; statement of whether it is independent from the sponsor and competing interests; and reference to where further details about its charter can be found, if not in the protocol. Alternatively, an explanation of why a DMC is not needed | ___9, 10___         |
| 17 |                                 |     |                                                                                                                                                                                                                                                                                                                                       |                     |
| 18 |                                 |     |                                                                                                                                                                                                                                                                                                                                       |                     |
| 19 |                                 |     |                                                                                                                                                                                                                                                                                                                                       |                     |
| 20 |                                 |     |                                                                                                                                                                                                                                                                                                                                       |                     |
| 21 |                                 |     |                                                                                                                                                                                                                                                                                                                                       |                     |
| 22 |                                 | 21b | Description of any interim analyses and stopping guidelines, including who will have access to these interim results and make the final decision to terminate the trial                                                                                                                                                               | ___9, 10___         |
| 23 |                                 |     |                                                                                                                                                                                                                                                                                                                                       |                     |
| 24 |                                 |     |                                                                                                                                                                                                                                                                                                                                       |                     |
| 25 | Harms                           | 22  | Plans for collecting, assessing, reporting, and managing solicited and spontaneously reported adverse events and other unintended effects of trial interventions or trial conduct                                                                                                                                                     | ___9, 10___         |
| 26 |                                 |     |                                                                                                                                                                                                                                                                                                                                       |                     |
| 27 |                                 |     |                                                                                                                                                                                                                                                                                                                                       |                     |
| 28 | Auditing                        | 23  | Frequency and procedures for auditing trial conduct, if any, and whether the process will be independent from investigators and the sponsor                                                                                                                                                                                           | ___9, 10___         |
| 29 |                                 |     |                                                                                                                                                                                                                                                                                                                                       |                     |
| 30 |                                 |     |                                                                                                                                                                                                                                                                                                                                       |                     |
| 31 |                                 |     |                                                                                                                                                                                                                                                                                                                                       |                     |
| 32 | <b>Ethics and dissemination</b> |     |                                                                                                                                                                                                                                                                                                                                       |                     |
| 33 |                                 |     |                                                                                                                                                                                                                                                                                                                                       |                     |
| 34 | Research ethics approval        | 24  | Plans for seeking research ethics committee/institutional review board (REC/IRB) approval                                                                                                                                                                                                                                             | ___10___            |
| 35 |                                 |     |                                                                                                                                                                                                                                                                                                                                       |                     |
| 36 |                                 |     |                                                                                                                                                                                                                                                                                                                                       |                     |
| 37 | Protocol amendments             | 25  | Plans for communicating important protocol modifications (eg, changes to eligibility criteria, outcomes, analyses) to relevant parties (eg, investigators, REC/IRBs, trial participants, trial registries, journals, regulators)                                                                                                      | ___2, 10___         |
| 38 |                                 |     |                                                                                                                                                                                                                                                                                                                                       |                     |
| 39 |                                 |     |                                                                                                                                                                                                                                                                                                                                       |                     |
| 40 |                                 |     |                                                                                                                                                                                                                                                                                                                                       |                     |
| 41 |                                 |     |                                                                                                                                                                                                                                                                                                                                       |                     |
| 42 |                                 |     |                                                                                                                                                                                                                                                                                                                                       |                     |
| 43 |                                 |     |                                                                                                                                                                                                                                                                                                                                       |                     |
| 44 |                                 |     |                                                                                                                                                                                                                                                                                                                                       |                     |
| 45 |                                 |     |                                                                                                                                                                                                                                                                                                                                       |                     |
| 46 |                                 |     |                                                                                                                                                                                                                                                                                                                                       |                     |



|    |                               |     |                                                                                                                                                                                                                                                                                     |                                       |
|----|-------------------------------|-----|-------------------------------------------------------------------------------------------------------------------------------------------------------------------------------------------------------------------------------------------------------------------------------------|---------------------------------------|
| 1  | Consent or assent             | 26a | Who will obtain informed consent or assent from potential trial participants or authorised surrogates, and how (see Item 32)                                                                                                                                                        | _____10_____                          |
| 2  |                               |     |                                                                                                                                                                                                                                                                                     |                                       |
| 3  |                               |     |                                                                                                                                                                                                                                                                                     |                                       |
| 4  |                               | 26b | Additional consent provisions for collection and use of participant data and biological specimens in ancillary studies, if applicable                                                                                                                                               | _____N/A_____                         |
| 5  |                               |     |                                                                                                                                                                                                                                                                                     |                                       |
| 6  |                               |     |                                                                                                                                                                                                                                                                                     |                                       |
| 7  | Confidentiality               | 27  | How personal information about potential and enrolled participants will be collected, shared, and maintained in order to protect confidentiality before, during, and after the trial                                                                                                | _____10_____                          |
| 8  |                               |     |                                                                                                                                                                                                                                                                                     |                                       |
| 9  |                               |     |                                                                                                                                                                                                                                                                                     |                                       |
| 10 | Declaration of interests      | 28  | Financial and other competing interests for principal investigators for the overall trial and each study site                                                                                                                                                                       | _____11,12_____                       |
| 11 |                               |     |                                                                                                                                                                                                                                                                                     |                                       |
| 12 |                               |     |                                                                                                                                                                                                                                                                                     |                                       |
| 13 | Access to data                | 29  | Statement of who will have access to the final trial dataset, and disclosure of contractual agreements that limit such access for investigators                                                                                                                                     | _____2, 10_____                       |
| 14 |                               |     |                                                                                                                                                                                                                                                                                     |                                       |
| 15 |                               |     |                                                                                                                                                                                                                                                                                     |                                       |
| 16 | Ancillary and post-trial care | 30  | Provisions, if any, for ancillary and post-trial care, and for compensation to those who suffer harm from trial participation                                                                                                                                                       | _____N/A_____                         |
| 17 |                               |     |                                                                                                                                                                                                                                                                                     |                                       |
| 18 |                               |     |                                                                                                                                                                                                                                                                                     |                                       |
| 19 |                               |     |                                                                                                                                                                                                                                                                                     |                                       |
| 20 | Dissemination policy          | 31a | Plans for investigators and sponsor to communicate trial results to participants, healthcare professionals, the public, and other relevant groups (eg, via publication, reporting in results databases, or other data sharing arrangements), including any publication restrictions | _____2,12_____                        |
| 21 |                               |     |                                                                                                                                                                                                                                                                                     |                                       |
| 22 |                               |     |                                                                                                                                                                                                                                                                                     |                                       |
| 23 |                               |     |                                                                                                                                                                                                                                                                                     |                                       |
| 24 |                               | 31b | Authorship eligibility guidelines and any intended use of professional writers                                                                                                                                                                                                      | _____N/A_____                         |
| 25 |                               |     |                                                                                                                                                                                                                                                                                     |                                       |
| 26 |                               | 31c | Plans, if any, for granting public access to the full protocol, participant-level dataset, and statistical code                                                                                                                                                                     | _____N/A_____                         |
| 27 |                               |     |                                                                                                                                                                                                                                                                                     |                                       |
| 28 |                               |     |                                                                                                                                                                                                                                                                                     |                                       |
| 29 | <b>Appendices</b>             |     |                                                                                                                                                                                                                                                                                     |                                       |
| 30 |                               |     |                                                                                                                                                                                                                                                                                     |                                       |
| 31 | Informed consent materials    | 32  | Model consent form and other related documentation given to participants and authorised surrogates                                                                                                                                                                                  | _available upon request in Czech_____ |
| 32 |                               |     |                                                                                                                                                                                                                                                                                     |                                       |
| 33 |                               |     |                                                                                                                                                                                                                                                                                     |                                       |
| 34 |                               |     |                                                                                                                                                                                                                                                                                     |                                       |
| 35 | Biological specimens          | 33  | Plans for collection, laboratory evaluation, and storage of biological specimens for genetic or molecular analysis in the current trial and for future use in ancillary studies, if applicable                                                                                      | _____N/A_____                         |
| 36 |                               |     |                                                                                                                                                                                                                                                                                     |                                       |
| 37 |                               |     |                                                                                                                                                                                                                                                                                     |                                       |

38  
39 \*It is strongly recommended that this checklist be read in conjunction with the SPIRIT 2013 Explanation & Elaboration for important clarification on the items.  
40 Amendments to the protocol should be tracked and dated. The SPIRIT checklist is copyrighted by the SPIRIT Group under the Creative Commons  
41 "[Attribution-NonCommercial-NoDerivs 3.0 Unported](https://creativecommons.org/licenses/by-nc-nd/3.0/)" license.  
42
